# Supplementary material for: Comparison of in Silico Strategies to Prioritize Rare Genomic Variants Impacting RNA Splicing for the Diagnosis of Genomic Disorders
Source: Research Square preprint supplement (doi:10.21203/rs.3.rs-311579/v1), 2021-03-22
Supplement: Supplementary file 1 [file a6e3148e22c78d9e3eef8364.xlsx]

## Sheet: Table-S1-modified
HGVS_cDNA	Gene_Symbol	GRCh37_CHR	GRCh37_POS	GRCh37_REF	GRCh37_ALT	GRCh38_CHR	GRCh38_POS	GRCh38_REF	GRCh38_ALT	Functional_Outcome	Splicing_Region	SpliceAI_MAXscore	Outcome_SpliceAI	CADD	Outcome_CADD	SPIDEX	Outcome_SPIDEX	TraP	Outcome_TraP	S-CAP	Outcome_S-CAP	MMsplice	Outcome_MMsplice	KipoiSplice	Outcome_KipoiSplice	MaxEntScan	Outcome_MaxEntScan	Consensus	Outcome_Consensus	Novel_Weighted_SpliceAI_and_Consensus
NM_014874.3:c.838C>T	MFN2	1	12061479	C	T	1	12001422	C	T	TN	exonic	0	TN	26.8	FP	0.2014	TN	0.077	TN	0	TN	0.0940808	TN	0	TN	0	TN	1	TN	0.125
NM_001146289.1:c.1224-80G>A	P3H1 (LEPRE1)	1	43220741	C	T	1	42755070	C	T	TP	deep-intronic	0.62	TP	19.87	TP	5.6272	TP	0.114	TP	0	TP	0.0796834	FN	0	FN	3.35	TP	6	TP	1.37
NM_000350.2:c.5584+6T>C	ABCA4	1	94476812	A	G	1	94011256	A	G	TP	5extended	0.4477	TP	17.16	TP	0.23	FN	0.939	TP	1	TP	1.3745	FN	0.801797	FN	1.3	TP	5	TP	1.0727
NM_005850.4:c.417C>T	SF3B4	1	149898557	G	A	1	149926665	G	A	TP	exonic	0.37	TP	14.71	TP	0.0855	FN	0.732	TP	0.15809	TP	0.08185	FN	0	FN	7.76	TP	5	TP	0.995
NM_019032.5:c.2559G>A	ADAMTSL4	1	150531125	G	A	1	150558649	G	A	TP	5extended	0.61	TP	20.7	TP	1.8605	TP	0.924	TP	0	FN	2.29186	TP	0.866852	FN	3.71	TP	6	TP	1.36
NM_206933.2:c.14343+36C>G	USH2A	1	215823898	G	C	1	215650556	G	C	TN	5intronic	0	TN	0.235	TN	0	TN	0.083	TN	0.0308045	FP	0.0257419	TN	0.45238	TN	0	TN	2	TN	0.25
NM_001011.3:c.507+3A>G	RPS7	2	3627853	A	G	2	3580263	A	G	TN	5extended	0.08	TN	9.712	FP	1.4018	FP	0.523	FP	0.0114785	FP	1.26593	TN	0.880451	TN	4.31	FP	5	FP	0.705
NM_000179.2:c.806C>G	MSH6	2	48025928	C	G	2	47798789	C	G	TN	exonic	0.01	TN	8.619	FP	0.1214	TN	0.238	TN	0	TN	0.0446416	TN	0	TN	5.41	FP	2	TN	0.26
NM_000179.2:c.3416G>A	MSH6	2	48030802	G	A	2	47803663	G	A	TN	exonic	0	TN	29.7	FP	0.0282	TN	0.149	TN	0	TN	0.174805	TN	0.401826	TN	0	TN	1	TN	0.125
NM_000179.2:c.3439-16C>T	MSH6	2	48032033	C	T	2	47804894	C	T	TN	3intronic	0	TN	10.92	FP	0.0253	TN	0.047	TN	0.0076189	FP	0.494804	TN	0.0674852	TN	0	TN	2	TN	0.25
NM_006343.2:c.2486+6T>A	MERTK	2	112779977	T	A	2	112022400	T	A	TP	5extended	0.6627	TP	17.79	TP	5.72	TP	0.884	TP	0.0388048	TP	2.42292	TP	0.923839	FN	5.1	TP	7	TP	1.5377
NM_001040142.1:c.2919+3A>G	SCN2A	2	166201424	A	G	2	165344914	A	G	TP	5extended	0.5729	TP	22.3	TP	5.17	TP	0.693	TP	0.0184928	TP	2.13136	TP	0.893446	FN	4	TP	7	TP	1.4479
NM_000090.3:c.1815+5G>A	COL3A1	2	189861949	G	A	2	188997223	G	A	TN	5extended	0	TN	11.56	FP	6.2828	FP	0.934	FP	0.00746053	FP	1.97674	TN	0.80021	TN	2.86	FP	5	FP	0.625
NM_000090.3:c.3133G>A	COL3A1	2	189871110	G	A	2	189006384	G	A	TN	exonic	0	TN	23.2	FP	0.6125	TN	0.012	TN	0	TN	0.0269684	TN	0.436214	TN	0	TN	1	TN	0.125
NM_018297.3:c.930C>T	NGLY1	3	25778898	G	A	3	25737407	G	A	TP	exonic	0.97	TP	16.25	TP	6.1529	TP	0.816	TP	0	FN	0.292111	FN	0.510833	FN	7.76	TP	5	TP	1.595
NM_000249.3:c.80G>A	MLH1	3	37035118	G	A	3	36993627	G	A	TN	exonic	0.03	TN	33	FP	0	TN	0.506	FP	0	TN	0.0876459	TN	0.497469	TN	0	TN	2	TN	0.28
NM_000249.3:c.122A>G	MLH1	3	37038115	A	G	3	36996624	A	G	TP	exonic	0.01	FN	29.1	TP	3.7873	TP	0.484	TP	0	FN	0.530073	FN	0.314455	FN	0	FN	3	FN	0.385
NM_000249.3:c.935A>C	MLH1	3	37061851	A	C	3	37020360	A	C	TN	exonic	0	TN	26.7	FP	0.302	TN	0.254	TN	0	TN	0.0540939	TN	0	TN	0	TN	1	TN	0.125
NM_000249.3:c.1989+6T>G	MLH1	3	37090106	T	G	3	37048615	T	G	TN	5extended	0.54	FP	14.84	FP	2.2709	FP	0.882	FP	0.004046	TN	1.7878	TN	0.836934	TN	2.76	FP	5	FP	1.165
NM_052985.3:c.3039+4A>G	IFT122	3	129226609	A	G	3	129507766	A	G	TP	5extended	0.52	TP	21.8	TP	15.7181	TP	0.985	TP	0.0183628	TP	1.74589	FN	0.753228	FN	2.7	TP	6	TP	1.27
NM_000283.3:c.2130-15G>A	PDE6B	4	658655	G	A	4	664866	G	A	TP	3intronic	0.2578	TP	5.99	TP	0.62	FN	0.07	FN	0.440719	TP	1.32963	FN	0.263044	FN	0.857143	TP	4	TP	0.7578
NM_002890.2:c.2011+6T>G	RASA1	5	86670739	T	G	5	87374922	T	G	TP	5extended	0.94	TP	25	TP	0.4144	FN	0.926	TP	0.020444	TP	1.92193	FN	0.86732	FN	4.17	TP	5	TP	1.565
NM_002397.4:c.835-9T>G	MEF2C	5	88025173	A	C	5	88729356	A	C	TP	3intronic	1	TP	22.2	TP	0.2806	FN	0.645	TP	0.881003	TP	2.78027	TP	0.94135	FN	5.28	TP	6	TP	1.75
NM_001354896.1:c.295C>T	APC	5	112102960	C	T	5	112767263	C	T	TN	exonic	0.03	TN	28.2	FP	0.0536	TN	0.03	TN	0	TN	0.157929	TN	0	TN	1.62	FP	2	TN	0.28
NM_000038.5:c.1549-8A>G	APC	5	112163618	A	G	5	112827921	A	G	TP	3intronic	0.99	TP	22.5	TP	4.6249	TP	0.101	FN	0.672509	TP	2.19962	TP	0.914064	FN	7	TP	6	TP	1.74
NM_001999.3:c.4594+3A>G	FBN2	5	127654568	T	C	5	128318876	T	C	TP	5extended	0.21	TP	16.2	TP	9.4478	TP	0.674	TP	0.011001	TP	0.39167	FN	0.858557	FN	3.65	TP	6	TP	0.96
NM_080680.2:c.2682G>A	COL11A2	6	33141279	C	T	6	33173502	C	T	TN	exonic	0.06	TN	21.9	FP	2.7586	FP	0.867	FP	0.00227066	TN	0.301393	TN	0.700467	TN	1.82	FP	4	FP	0.56
NM_001142800.1:c.6571+4558A>G	EYS	6	64787191	T	C	6	64077298	T	C	TN	deep-intronic	0	TN	1.84	FP	0	TN	0.147	TN	0	TN	0	TN	0	TN	0	TN	1	TN	0.125
NM_006208.2:c.241G>T	ENPP1	6	132168916	G	T	6	131847776	G	T	TP	exonic	0.34	TP	24.4	TP	2.0886	TP	0.522	TP	0	FN	0.224499	FN	0.825792	FN	2.57	TP	5	TP	0.965
NM_001277115.1:c.6547-963G>A	DNAH11	7	21746354	G	A	7	21706736	G	A	TP	3intronic	0.667	TP	5.347	TP	0	FN	0.013	FN	0	FN	0	FN	0	FN	4.7	TP	3	FN	1.042
NM_000492.3:c.3874-4522A>G	CFTR	7	117288374	A	G	7	117648320	A	G	TP	deep-intronic	0.03	FN	2.451	TP	0	FN	0.129	FN	0	FN	0	FN	0	FN	5.1	TP	2	FN	0.28
NM_001174067.1:c.1029G>A	FGFR1	8	38282027	C	T	8	38424509	C	T	TP	exonic	0.77	TP	27.5	TP	0.6732	FN	0.686	TP	0.295249	TP	0.376902	FN	0.975446	TP	6.83	TP	6	TP	1.52
NM_017890.4:c.7226C>T	VPS13B	8	100779102	C	T	8	99766874	C	T	TN	exonic	0	TN	29.3	FP	0.473	TN	0.095	TN	0	TN	0.0951494	TN	0	TN	0	TN	1	TN	0.125
NM_000264.4:c.2704-11C>T	PTCH1	9	98222076	G	A	9	95459794	G	A	TN	3intronic	0	TN	12.63	FP	0.6904	TN	0.16	TN	0.00564541	TN	0.394964	TN	0.0754387	TN	0	TN	1	TN	0.125
NM_001306210.1:c.574G>C	TGFBR1	9	101895009	G	C	9	99132727	G	C	TP	5extended	0.01	FN	29.9	TP	1.4793	TP	0.285	FN	0	FN	0.0790105	FN	0.433122	FN	0	FN	2	FN	0.26
NM_000368.4:c.211-7T>G	TSC1	9	135801133	A	C	9	132925746	A	C	TP	3intronic	0.99	TP	28.2	TP	0.7418	FN	0.492	TP	0.894648	TP	3.35938	TP	0.945003	FN	8.6	TP	6	TP	1.74
NM_000093.3:c.1195G>A	COL5A1	9	137623372	G	A	9	134731526	G	A	TN	exonic	0.01	TN	13.37	FP	0.3492	TN	0.001	TN	0	TN	0.0873817	TN	0	TN	0	TN	1	TN	0.135
NM_000314.4:c.253G>C	PTEN	10	89690846	G	C	10	87931089	G	C	TP	5extended	0.55	TP	36	TP	2.0867	TP	0.932	TP	0	FN	2.82766	TP	0.853884	FN	2.87	TP	6	TP	1.3
NM_000314.4:c.373A>G	PTEN	10	89692889	A	G	10	87933132	A	G	TN	exonic	0.02	TN	26.9	FP	0.1982	TN	0.052	TN	0	TN	0.19102	TN	0	TN	0	TN	1	TN	0.145
NM_000314.4:c.553C>G	PTEN	10	89711935	C	G	10	87952178	C	G	TN	exonic	0	TN	21.6	FP	0.0624	TN	0.066	TN	0	TN	0.159372	TN	0	TN	0	TN	1	TN	0.125
NM_000314.4:c.593T>C	PTEN	10	89711975	T	C	10	87952218	T	C	TN	exonic	0	TN	23.7	FP	0.0307	TN	0.072	TN	0	TN	0.246007	TN	0.445786	TN	0	TN	1	TN	0.125
NM_000314.4:c.830C>T	PTEN	10	89720679	C	T	10	87960922	C	T	TN	exonic	0.1	TN	24.3	FP	0.2286	TN	0.021	TN	0	TN	0.0713511	TN	0	TN	0	TN	1	TN	0.225
NM_006204.3:c.1072-11T>C	PDE6C	10	95389004	T	C	10	93629247	T	C	TN	3intronic	0.0585	TN	15.64	FP	0.45	TN	0.234	TN	0.0219134	FP	0.6383	TN	0.101965	TN	1.1	TN	2	TN	0.3085
NM_000256.3:c.3815-10T>G	MYBPC3	11	47353442	A	C	11	47331891	A	C	TN	3intronic	0.37	FP	13.73	FP	14.8419	FP	0.257	TN	0.0338907	FP	0.944878	TN	0.142491	TN	0	TN	4	FP	0.87
NM_000256.3:c.1624+4A>T	MYBPC3	11	47364125	T	A	11	47342574	T	A	TP	5extended	0.16	FN	22.4	TP	5.0462	TP	0.965	TP	0.0967632	TP	0.168735	FN	0.911	FN	4.2	TP	5	TP	0.785
NM_000256.3:c.1457+5G>C	MYBPC3	11	47364376	C	G	11	47342825	C	G	TP	5extended	0.93	TP	24	TP	19.173	TP	0.954	TP	0.218335	TP	0.372968	FN	0.974742	TP	6.8	TP	7	TP	1.805
NM_000256.3:c.1224-21A>G	MYBPC3	11	47364834	T	C	11	47343283	T	C	TP	3intronic	0.9	TP	14.29	TP	0.9194	FN	0.031	FN	0.0242296	TP	0.417275	FN	0.0367243	FN	0	FN	3	FN	1.275
NM_000256.3:c.1224-21A>G	MYBPC3	11	47364834	T	C	11	47343283	T	C	TP	3intronic	0.8994	TP	4.775	TP	0	FN	0.031	FN	0.0242296	TP	0.417275	FN	0.0367243	FN	0.1	FN	3	FN	1.2744
NM_130799.2:c.1050-3C>G	MEN1	11	64573245	G	C	11	64805773	G	C	TP	3intronic	0.95	TP	27.9	TP	4.9583	TP	0.538	TP	0.887318	TP	3.81804	TP	0.999773	TP	5.19	TP	8	TP	1.95
NM_024649.4:c.592-21A>T	BBS1	11	66287067	A	T	11	66519596	A	T	TN	3intronic	0.204	FP	8.795	FP	0	TN	0.092	TN	0.0411586	FP	0.907034	TN	0.072995	TN	0	TN	3	TN	0.579
NM_006946.2:c.4150C>A	SPTBN2	11	66463876	G	T	11	66696405	G	T	TN	exonic	0.01	TN	10.91	FP	0.5183	TN	0.15	TN	0.0194631	FP	0.00156272	TN	0	TN	4.52	FP	3	TN	0.385
NM_007103.3:c.1080G>A	NDUFV1	11	67379040	G	A	11	67611569	G	A	TP	5extended	0.21	TP	22.3	TP	0.2217	FN	0.922	TP	0	FN	3.19286	TP	0.905899	FN	5.28	TP	5	TP	0.835
NM_002335.2:c.1413-7T>A	LRP5	11	68157342	T	A	11	68389874	T	A	TN	3intronic	0.3578	FP	11.65	FP	0	TN	0.269	TN	0.020375	FP	1.51889	TN	0.23852	TN	1.6	FP	4	FP	0.8578
NM_016401.3:c.539+3A>G	HIKESHI (C11orf73)	11	86055766	A	G	11	86344724	A	G	TP	5extended	0.6	TP	23.5	TP	0.7989	FN	0.731	TP	0	FN	2.18229	TP	0.936663	FN	4.87	TP	5	TP	1.225
NM_003002.2:c.314+5G>A	SDHD	11	111959740	G	A	11	112089016	G	A	TP	5extended	0.59	TP	20.6	TP	8.9261	TP	0.969	TP	0.0378299	TP	3.55108	TP	0.93026	FN	2.89	TP	7	TP	1.465
NM_000059.3:c.79A>G	BRCA2	13	32893225	A	G	13	32319088	A	G	TN	exonic	0.01	TN	15.66	FP	0.0882	TN	0.523	FP	0	TN	0.0434552	TN	0	TN	8.18	FP	3	TN	0.385
NM_000059.3:c.167A>C	BRCA2	13	32893313	A	C	13	32319176	A	C	TN	exonic	0	TN	0.121	TN	0.1417	TN	0.016	TN	0	TN	0.0185257	TN	0	TN	0	TN	0	TN	0
NM_000059.3:c.223G>C	BRCA2	13	32893369	G	C	13	32319232	G	C	TN	exonic	0	TN	26	FP	0.7259	TN	0.058	TN	0	TN	0.0205947	TN	0	TN	0	TN	1	TN	0.125
NM_000059.3:c.280C>T	BRCA2	13	32893426	C	T	13	32319289	C	T	TN	exonic	0	TN	24.4	FP	0.2453	TN	0.019	TN	0	TN	0.0007991	TN	0.424063	TN	1.1	FP	2	TN	0.25
NM_000059.3:c.441A>G	BRCA2	13	32900253	A	G	13	32326116	A	G	TN	exonic	0.04	TN	0.12	TN	1.6598	FP	0.182	TN	0.0820705	FP	0.0195802	TN	0.392514	TN	7.5	FP	3	TN	0.415
NM_000059.3:c.506A>G	BRCA2	13	32900409	A	G	13	32326272	A	G	TN	exonic	0.12	TN	15.85	FP	0.2052	TN	0.267	TN	0	TN	0.0618236	TN	0.493517	TN	5.88	FP	2	TN	0.37
NM_000059.3:c.520C>T	BRCA2	13	32900639	C	T	13	32326502	C	T	TP	exonic	0.27	TP	21.6	TP	3.6816	TP	0	FN	0	FN	0.365588	FN	0	FN	0	FN	3	FN	0.645
NM_000059.3:c.598A>G	BRCA2	13	32900717	A	G	13	32326580	A	G	TN	exonic	0.07	TN	24.9	FP	1.4037	FP	0.063	TN	0	TN	0.180447	TN	0.45393	TN	0	TN	2	TN	0.32
NM_000059.3:c.632-3C>G	BRCA2	13	32903577	C	G	13	32329440	C	G	TP	3intronic	0.95	TP	25.1	TP	0.954	TP	0.581	TP	0.833545	TP	1.08464	FN	0.999951	TP	8.03	TP	7	TP	1.825
NM_000059.3:c.772C>A	BRCA2	13	32905146	C	A	13	32331009	C	A	TN	exonic	0.02	TN	10.94	FP	0.1287	TN	0.017	TN	0	TN	0.132023	TN	0.350489	TN	0	TN	1	TN	0.145
NM_000059.3:c.1127T>G	BRCA2	13	32906742	T	G	13	32332605	T	G	TN	exonic	0	TN	19.7	FP	0.0329	TN	0.254	TN	0	TN	0.00914335	TN	0	TN	2.39	FP	2	TN	0.25
NM_000059.3:c.1291A>C	BRCA2	13	32906906	A	C	13	32332769	A	C	TN	exonic	0	TN	11.52	FP	0.0077	TN	0.031	TN	0	TN	0.00455623	TN	0	TN	0	TN	1	TN	0.125
NM_000059.3:c.1480G>A	BRCA2	13	32907095	G	A	13	32332958	G	A	TN	exonic	0	TN	0.005	TN	0.0997	TN	0.036	TN	0	TN	0.00202927	TN	0	TN	0	TN	0	TN	0
NM_000059.3:c.1804G>A	BRCA2	13	32907419	G	A	13	32333282	G	A	TN	exonic	0	TN	17.95	FP	0.0233	TN	0.014	TN	0	TN	0.0144704	TN	0	TN	0	TN	1	TN	0.125
NM_000059.3:c.1936A>C	BRCA2	13	32910428	A	C	13	32336291	A	C	TN	exonic	0	TN	9.131	FP	0.5654	TN	0.059	TN	0	TN	0.00219014	TN	0	TN	0	TN	1	TN	0.125
NM_000059.3:c.2803G>C	BRCA2	13	32911295	G	C	13	32337158	G	C	TN	exonic	0.01	TN	14.29	FP	0.062	TN	0.016	TN	0	TN	0.0014699	TN	0	TN	0	TN	1	TN	0.135
NM_000059.3:c.2810A>C	BRCA2	13	32911302	A	C	13	32337165	A	C	TN	exonic	0	TN	21.7	FP	0.0054	TN	0.009	TN	0	TN	0.00326112	TN	0	TN	0	TN	1	TN	0.125
NM_000059.3:c.3032C>G	BRCA2	13	32911524	C	G	13	32337387	C	G	TN	exonic	0	TN	26.1	FP	0.0027	TN	0.565	FP	0	TN	0.00820983	TN	0	TN	0	TN	2	TN	0.25
NM_000059.3:c.3073A>G	BRCA2	13	32911565	A	G	13	32337428	A	G	TN	exonic	0	TN	20.7	FP	0.0239	TN	0.016	TN	0	TN	0.00374891	TN	0	TN	0	TN	1	TN	0.125
NM_000059.3:c.6938-4C>T	BRCA2	13	32920960	C	T	13	32346823	C	T	TN	3intronic	0.01	TN	11.33	FP	0.5828	TN	0.039	TN	0.019152	FP	0.0210969	TN	0.13005	TN	0	TN	2	TN	0.26
NM_000059.3:c.7021C>T	BRCA2	13	32929011	C	T	13	32354874	C	T	TN	exonic	0.04	TN	13.76	FP	0.0396	TN	0.026	TN	0	TN	0.0823503	TN	0	TN	0	TN	1	TN	0.165
NM_000059.3:c.7610A>G	BRCA2	13	32930739	A	G	13	32356602	A	G	TN	exonic	0	TN	17.58	FP	0.2379	TN	0.04	TN	0	TN	0.0529158	TN	0.345084	TN	0	TN	1	TN	0.125
NM_000059.3:c.7822C>G	BRCA2	13	32936676	C	G	13	32362539	C	G	TN	exonic	0.01	TN	26.6	FP	0.7632	TN	0.196	TN	0	TN	0.058803	TN	0	TN	0	TN	1	TN	0.135
NM_000059.3:c.8192A>G	BRCA2	13	32937531	A	G	13	32363394	A	G	TN	exonic	0.01	TN	17.14	FP	0.0753	TN	0.014	TN	0	TN	0.0160786	TN	0	TN	3.28	FP	2	TN	0.26
NM_000059.3:c.8258T>C	BRCA2	13	32937597	T	C	13	32363460	T	C	TN	exonic	0	TN	17.77	FP	0.0049	TN	0.023	TN	0	TN	0.0276658	TN	0.405433	TN	0	TN	1	TN	0.125
NM_000059.3:c.8378G>T	BRCA2	13	32944585	G	T	13	32370448	G	T	TP	exonic	0.36	TP	32	TP	0.5545	FN	0.406	FN	0	FN	0.400388	FN	0	FN	1.8	TP	3	FN	0.735
NM_000059.3:c.8486A>G	BRCA2	13	32944693	A	G	13	32370556	A	G	TP	5extended	0.36	TP	33	TP	1.0614	TP	0.986	TP	0	FN	1.44529	FN	0.733291	FN	1.83	TP	5	TP	0.985
NM_000059.3:c.8963G>A	BRCA2	13	32953896	G	A	13	32379759	G	A	TN	exonic	0.03	TN	18.6	FP	0.0566	TN	0.005	TN	0	TN	0.0854285	TN	0	TN	0	TN	1	TN	0.155
NM_000059.3:c.9104A>C	BRCA2	13	32954037	A	C	13	32379900	A	C	TN	exonic	0.01	TN	26.3	FP	0.4963	TN	0.037	TN	0	TN	0.128568	TN	0.468904	TN	0	TN	1	TN	0.135
NM_000059.3:c.9104A>G	BRCA2	13	32954037	A	G	13	32379900	A	G	TN	exonic	0.01	TN	26.7	FP	0.2657	TN	0.29	TN	0	TN	0.0559938	TN	0.479907	TN	0	TN	1	TN	0.135
NM_000059.3:c.9242T>C	BRCA2	13	32954268	T	C	13	32380131	T	C	TN	exonic	0	TN	27.8	FP	0.2065	TN	0.354	TN	0	TN	0.384826	TN	0.355056	TN	0	TN	1	TN	0.125
NM_000059.3:c.9367A>G	BRCA2	13	32968936	A	G	13	32394799	A	G	TN	exonic	0.19	TN	27.3	FP	0.0769	TN	0.695	FP	0	TN	0.0205689	TN	0	TN	6.19	FP	3	TN	0.565
NM_000059.3:c.9456G>T	BRCA2	13	32969025	G	T	13	32394888	G	T	TN	exonic	0	TN	4.338	TN	0.0772	TN	0.005	TN	0	TN	0.120348	TN	0.415983	TN	0	TN	0	TN	0
NM_000059.3:c.9502-13C>G	BRCA2	13	32971022	C	G	13	32396885	C	G	TN	3intronic	0.71	FP	16.11	FP	0.5129	TN	0.407	FP	0.496831	FP	1.87853	TN	0.432847	TN	2.8	FP	5	FP	1.335
NM_000059.3:c.9586A>G	BRCA2	13	32971119	A	G	13	32396982	A	G	TN	exonic	0	TN	21.2	FP	0.5785	TN	0.025	TN	0	TN	0.352117	TN	0.387507	TN	1.14	FP	2	TN	0.25
NM_000059.3:c.9604C>T	BRCA2	13	32971137	C	T	13	32397000	C	T	TN	exonic	0	TN	0.078	TN	0.1303	TN	0.066	TN	0	TN	0.142603	TN	0.400508	TN	0	TN	0	TN	0
NM_000059.3:c.10045A>G	BRCA2	13	32972695	A	G	13	32398558	A	G	TN	exonic	0.05	TN	25.8	FP	0	TN	0.068	TN	0	TN	0.0164395	TN	0	TN	0	TN	1	TN	0.175
NM_000059.3:c.10249T>C	BRCA2	13	32972899	T	C	13	32398762	T	C	TN	exonic	0	TN	0.783	TN	0	TN	0.024	TN	0	TN	0.020223	TN	0	TN	0	TN	0	TN	0
NM_020366.3:c.491-386C>T	RPGRIP1	14	21770261	C	T	14	21302102	C	T	TN	deep-intronic	0	TN	4.924	FP	0	TN	0.276	TN	0	TN	0	TN	0	TN	0	TN	1	TN	0.125
NM_030621.4:c.1509G>A	DICER1	14	95583959	C	T	14	95117622	C	T	TP	5extended	0.51	TP	24.8	TP	0.0832	FN	0.997	TP	0.028591	TP	0.688378	FN	0.940665	FN	4.66	TP	5	TP	1.135
NM_002420.5:c.899+29G>A	TRPM1	15	31355292	C	T	15	31063089	C	T	TP	5intronic	0.5017	TP	5.993	TP	0	FN	0.692	TP	0.932164	TP	0.784314	FN	0.131724	FN	4.2	TP	5	TP	1.1267
NM_000138.4:c.8149G>A	FBN1	15	48704843	C	T	15	48412646	C	T	TN	exonic	0.04	TN	26.7	FP	1.4561	FP	0.053	TN	0	TN	0.0603239	TN	0.431489	TN	0	TN	2	TN	0.29
NM_000138.4:c.8037C>G	FBN1	15	48707747	G	C	15	48415550	G	C	TN	exonic	0	TN	24.5	FP	0.0324	TN	0.045	TN	0	TN	0.128776	TN	0.464635	TN	0	TN	1	TN	0.125
NM_000138.4:c.7916A>G	FBN1	15	48707868	T	C	15	48415671	T	C	TN	exonic	0	TN	24.8	FP	0.3045	TN	0.174	TN	0	TN	0.01563	TN	0	TN	0	TN	1	TN	0.125
NM_000138.4:c.7754T>C	FBN1	15	48712949	A	G	15	48420752	A	G	TN	exonic	0	TN	23.5	FP	1.0568	FP	0.348	TN	0	TN	0.14362	TN	0.493439	TN	0	TN	2	TN	0.25
NM_000138.4:c.7664G>T	FBN1	15	48713790	C	A	15	48421593	C	A	TN	exonic	0.01	TN	32	FP	4.0326	FP	0.327	TN	0	TN	0.242584	TN	0.441329	TN	3.18	FP	3	TN	0.385
NM_000138.4:c.7633C>T	FBN1	15	48713821	G	A	15	48421624	G	A	TN	exonic	0	TN	29.9	FP	0.8661	TN	0.051	TN	0	TN	0.0269981	TN	0.413774	TN	0	TN	1	TN	0.125
NM_000138.4:c.7606G>A	FBN1	15	48713848	C	T	15	48421651	C	T	TP	exonic	0.7	TP	33	TP	6.105	TP	0.551	TP	0	FN	0.111757	FN	0	FN	6.95	TP	5	TP	1.325
NM_000138.4:c.7582T>C	FBN1	15	48713872	A	G	15	48421675	A	G	TN	exonic	0.01	TN	31	FP	1.3508	FP	0.078	TN	0	TN	0.0196263	TN	0	TN	0	TN	2	TN	0.26
NM_000138.4:c.7379A>G	FBN1	15	48717640	T	C	15	48425443	T	C	TN	exonic	0.52	FP	28.2	FP	1.0324	FP	0.719	FP	0	TN	0.167464	TN	0.399667	TN	8.75	FP	5	FP	1.145
NM_000138.4:c.7204+7C>G	FBN1	15	48719757	G	C	15	48427560	G	C	TN	5intronic	0	TN	8.779	FP	1.5547	FP	0.01	TN	0.0415937	FP	0.185806	TN	0.431063	TN	0	TN	3	TN	0.375
NM_000138.4:c.7204G>C	FBN1	15	48719764	C	G	15	48427567	C	G	TP	5extended	0.75	TP	36	TP	8.7531	TP	0.931	TP	0	FN	0.00215284	FN	0.952221	TP	5.19	TP	6	TP	1.5
NM_000138.4:c.7203A>G	FBN1	15	48719765	T	C	15	48427568	T	C	TP	5extended	0.08	FN	22.1	TP	3.9569	TP	0.986	TP	0.158413	TP	0.435398	FN	0.829212	FN	2.81	TP	5	TP	0.705
NM_000138.4:c.7003C>T	FBN1	15	48719965	G	A	15	48427768	G	A	TN	exonic	0	TN	32	FP	0.9202	TN	0.058	TN	0	TN	0.126257	TN	0	TN	0	TN	1	TN	0.125
NM_000138.4:c.6815A>G	FBN1	15	48722924	T	C	15	48430727	T	C	TN	exonic	0	TN	26.1	FP	0.1594	TN	0.467	FP	0	TN	0.0504101	TN	0.439354	TN	5.7	FP	3	TN	0.375
NM_000138.4:c.6740-3C>G	FBN1	15	48723002	G	C	15	48430805	G	C	TP	3intronic	0.99	TP	26.5	TP	6.6069	TP	0.551	TP	0.976536	TP	4.0523	TP	0.996692	TP	8.3	TP	8	TP	1.99
NM_000138.4:c.6694T>C	FBN1	15	48725108	A	G	15	48432911	A	G	TN	exonic	0	TN	29.8	FP	1.9803	FP	0.129	TN	0	TN	0.170852	TN	0.0340912	TN	0	TN	2	TN	0.25
NM_000138.4:c.6453C>T	FBN1	15	48729201	G	A	15	48437004	G	A	TP	exonic	0.84	TP	18.94	TP	0.0267	FN	0.315	FN	0.483169	TP	0.248619	FN	0.403433	FN	7.38	TP	4	TP	1.34
NM_000138.4:c.6313+3A>T	FBN1	15	48729962	T	A	15	48437765	T	A	TP	5extended	0.85	TP	23.8	TP	16.1344	TP	0.918	TP	0.255452	TP	0.125737	FN	0.866787	FN	3.47	TP	6	TP	1.6
NM_000138.4:c.6251G>C	FBN1	15	48730027	C	G	15	48437830	C	G	TN	exonic	0	TN	24	FP	1.5051	FP	0.09	TN	0	TN	0.132018	TN	0.394028	TN	0	TN	2	TN	0.25
NM_000138.4:c.6164-3C>T	FBN1	15	48730117	G	A	15	48437920	G	A	TN	3intronic	0.08	TN	17.61	FP	1.1296	FP	0.373	FP	0.0979227	FP	0.928684	TN	0.122407	TN	0	TN	4	FP	0.58
NM_000138.4:c.6158G>A	FBN1	15	48733923	C	T	15	48441726	C	T	TN	exonic	0.01	TN	31	FP	0.6004	TN	0.045	TN	0	TN	0.139507	TN	0.325377	TN	4.46	FP	2	TN	0.26
NM_000138.4:c.6031T>G	FBN1	15	48736744	A	C	15	48444547	A	C	TN	exonic	0.02	TN	31	FP	0.7702	TN	0.068	TN	0	TN	0.203223	TN	0.457857	TN	1.18	FP	2	TN	0.27
NM_000138.4:c.5926G>A	FBN1	15	48736849	C	T	15	48444652	C	T	TN	exonic	0.03	TN	32	FP	0.2149	TN	0.044	TN	0	TN	0.451088	TN	0	TN	0	TN	1	TN	0.155
NM_000138.4:c.5834G>A	FBN1	15	48737656	C	T	15	48445459	C	T	TN	exonic	0.01	TN	29.6	FP	0.6516	TN	0.055	TN	0	TN	0.0435089	TN	0.0328136	TN	1.36	FP	2	TN	0.26
NM_000138.4:c.5789A>G	FBN1	15	48737701	T	C	15	48445504	T	C	TN	exonic	0.01	TN	32	FP	0.2273	TN	0.487	FP	0	TN	0.763145	TN	0.42569	TN	0	TN	2	TN	0.26
NM_000138.4:c.5788+5G>A	FBN1	15	48738898	C	T	15	48446701	C	T	TP	5extended	0.47	TP	24.1	TP	15.1887	TP	0.932	TP	0.916683	TP	0.298234	FN	0.965638	TP	5.79	TP	7	TP	1.345
NM_000138.4:c.5707G>A	FBN1	15	48738984	C	T	15	48446787	C	T	TN	exonic	0	TN	32	FP	3.4204	FP	0.693	FP	0	TN	0.265886	TN	0	TN	0	TN	3	TN	0.375
NM_000138.4:c.5678A>G	FBN1	15	48739013	T	C	15	48446816	T	C	TN	exonic	0	TN	24	FP	0.6299	TN	0.59	FP	0	TN	0.0159613	TN	0	TN	2.74	FP	3	TN	0.375
NM_000138.4:c.5627G>A	FBN1	15	48741009	C	T	15	48448812	C	T	TN	exonic	0	TN	31	FP	0.0737	TN	0.046	TN	0	TN	0.0933613	TN	0.386097	TN	0	TN	1	TN	0.125
NM_000138.4:c.5497T>C	FBN1	15	48744807	A	G	15	48452610	A	G	TN	exonic	0.01	TN	30	FP	2.7532	FP	0.062	TN	0	TN	0.128122	TN	0.424491	TN	0	TN	2	TN	0.26
NM_000138.4:c.5377T>C	FBN1	15	48748879	A	G	15	48456682	A	G	TN	exonic	0	TN	29.3	FP	0.0903	TN	0.04	TN	0	TN	0.209533	TN	0.341692	TN	0	TN	1	TN	0.125
NM_000138.4:c.5372G>T	FBN1	15	48748884	C	A	15	48456687	C	A	TN	exonic	0	TN	31	FP	0.1894	TN	0.068	TN	0	TN	0.113106	TN	0.367941	TN	1.14	FP	2	TN	0.25
NM_000138.4:c.5296G>A	FBN1	15	48752443	C	T	15	48460246	C	T	TP	5extended	0.91	TP	36	TP	13.7806	TP	0.86	TP	0	FN	0.0651043	FN	0.828412	FN	3.48	TP	5	TP	1.535
NM_000138.4:c.5021G>A	FBN1	15	48756140	C	T	15	48463943	C	T	TN	exonic	0	TN	30	FP	0.6428	TN	0.059	TN	0	TN	0.0418086	TN	0.438393	TN	0	TN	1	TN	0.125
NM_000138.4:c.4780G>A	FBN1	15	48758023	C	T	15	48465826	C	T	TN	exonic	0	TN	29.6	FP	1.0582	FP	0.573	FP	0	TN	0.102466	TN	0.405332	TN	1.46	FP	4	FP	0.5
NM_000138.4:c.4747+5G>A	FBN1	15	48760130	C	T	15	48467933	C	T	TP	5extended	0.89	TP	23.8	TP	5.7722	TP	0.955	TP	0.917454	TP	0.477209	FN	0.967422	TP	6.24	TP	7	TP	1.765
NM_000138.4:c.4582G>T	FBN1	15	48760609	C	A	15	48468412	C	A	TP	5extended	0.13	FN	35	TP	0.9533	TP	0.94	TP	0	FN	0.170464	FN	0.938698	FN	5.71	TP	4	TP	0.63
NM_000138.4:c.4343A>G	FBN1	15	48762947	T	C	15	48470750	T	C	TN	exonic	0	TN	23.9	FP	0.3301	TN	0.6	FP	0	TN	0.126951	TN	0	TN	8.18	FP	3	TN	0.375
NM_000138.4:c.4096G>A	FBN1	15	48766566	C	T	15	48474369	C	T	TN	exonic	0	TN	31	FP	0.9192	TN	0.013	TN	0	TN	0.249863	TN	0	TN	0	TN	1	TN	0.125
NM_000138.4:c.4031G>A	FBN1	15	48766781	C	T	15	48474584	C	T	TN	exonic	0	TN	28.9	FP	0.0569	TN	0.007	TN	0	TN	0.088513	TN	0.459459	TN	0	TN	1	TN	0.125
NM_000138.4:c.4027G>A	FBN1	15	48766785	C	T	15	48474588	C	T	TN	exonic	0	TN	23.7	FP	0.0051	TN	0.036	TN	0	TN	0.00713537	TN	0.44662	TN	2.53	FP	2	TN	0.25
NM_000138.4:c.3974A>T	FBN1	15	48766838	T	A	15	48474641	T	A	TN	exonic	0	TN	32	FP	0.032	TN	0.464	FP	0	TN	0.31914	TN	0	TN	5.86	FP	3	TN	0.375
NM_000138.4:c.3964G>C	FBN1	15	48773852	C	G	15	48481655	C	G	TP	5extended	0.97	TP	36	TP	1.122	TP	0.917	TP	0	FN	0.154566	FN	0.917662	FN	3.21	TP	5	TP	1.595
NM_000138.4:c.3963A>G	FBN1	15	48773853	T	C	15	48481656	T	C	TN	5extended	0.45	FP	22.7	FP	0.1209	TN	0.968	FP	0.034667	FP	0.0108049	TN	0.757411	TN	1.96	FP	5	FP	1.075
NM_000138.4:c.3772C>T	FBN1	15	48776081	G	A	15	48483884	G	A	TN	exonic	0	TN	28.9	FP	0.0164	TN	0.171	TN	0	TN	0.0296038	TN	0.34056	TN	0	TN	1	TN	0.125
NM_000138.4:c.3712G>A	FBN1	15	48777571	C	T	15	48485374	C	T	TN	5extended	0.54	FP	35	FP	0.519	TN	0.893	FP	0	TN	0.0826703	TN	0.749788	TN	2.62	FP	4	FP	1.04
NM_000138.4:c.3533A>G	FBN1	15	48779328	T	C	15	48487131	T	C	TN	exonic	0	TN	27.5	FP	0.6037	TN	0.366	TN	0	TN	0.0934715	TN	0.308882	TN	0	TN	1	TN	0.125
NM_000138.4:c.3509G>A	FBN1	15	48779352	C	T	15	48487155	C	T	TN	exonic	0	TN	22.9	FP	0.4315	TN	0.226	TN	0	TN	0.0621798	TN	0	TN	0	TN	1	TN	0.125
NM_000138.4:c.3463+3A>C	FBN1	15	48779506	T	G	15	48487309	T	G	TN	5extended	0.72	FP	23.5	FP	1.7868	FP	0.933	FP	0.951955	FP	0.679869	TN	0.966352	FP	6.71	FP	7	FP	1.595
NM_000138.4:c.3344A>G	FBN1	15	48779628	T	C	15	48487431	T	C	TN	exonic	0	TN	24.1	FP	0.0955	TN	0.593	FP	0	TN	0.129791	TN	0	TN	8.18	FP	3	TN	0.375
NM_000138.4:c.3332G>A	FBN1	15	48780315	C	T	15	48488118	C	T	TN	exonic	0	TN	29.8	FP	0.279	TN	0.186	TN	0	TN	0.0703446	TN	0.393079	TN	0	TN	1	TN	0.125
NM_000138.4:c.3268C>T	FBN1	15	48780379	G	A	15	48488182	G	A	TN	exonic	0	TN	27.1	FP	0.1392	TN	0.166	TN	0	TN	0.118455	TN	0.411695	TN	0	TN	1	TN	0.125
NM_000138.4:c.3209-13T>A	FBN1	15	48780451	A	T	15	48488254	A	T	TP	3intronic	1	TP	22.3	TP	3.548	TP	0.434	TP	0.982677	TP	2.67748	TP	0.917878	FN	8.06	TP	7	TP	1.875
NM_000138.4:c.3197G>C	FBN1	15	48780576	C	G	15	48488379	C	G	TN	exonic	0	TN	25.3	FP	3.5365	FP	0.194	TN	0	TN	0.0142306	TN	0.39275	TN	0	TN	2	TN	0.25
NM_000138.4:c.3124G>C	FBN1	15	48780649	C	G	15	48488452	C	G	TN	exonic	0	TN	31	FP	0.4811	TN	0.197	TN	0	TN	0.0498413	TN	0	TN	0	TN	1	TN	0.125
NM_000138.4:c.2953G>A	FBN1	15	48782177	C	T	15	48489980	C	T	TN	exonic	0	TN	28.7	FP	1.119	FP	0.645	FP	0	TN	0.0707973	TN	0	TN	5.05	FP	4	FP	0.5
NM_000138.4:c.2952C>A	FBN1	15	48782178	G	T	15	48489981	G	T	TN	exonic	0	TN	0.213	TN	1.8338	FP	0.11	TN	0.167227	FP	0.20141	TN	0	TN	8.04	FP	3	TN	0.375
NM_000138.4:c.2927G>A	FBN1	15	48782203	C	T	15	48490006	C	T	TN	exonic	0	TN	32	FP	0.4742	TN	0.213	TN	0	TN	0.0146088	TN	0	TN	0	TN	1	TN	0.125
NM_000138.4:c.2645C>T	FBN1	15	48787352	G	A	15	48495155	G	A	TN	exonic	0.01	TN	27.3	FP	0.0912	TN	0.308	TN	0	TN	0.200984	TN	0.472954	TN	0	TN	1	TN	0.135
NM_000138.4:c.2638G>A	FBN1	15	48787359	C	T	15	48495162	C	T	TN	exonic	0.02	TN	27.5	FP	0.7048	TN	0.684	FP	0	TN	0.0971721	TN	0.447363	TN	6.08	FP	3	TN	0.395
NM_000138.4:c.2369G>A	FBN1	15	48788347	C	T	15	48496150	C	T	TN	exonic	0	TN	31	FP	1.2956	FP	0.153	TN	0	TN	0.16084	TN	0.408887	TN	0	TN	2	TN	0.25
NM_000138.4:c.2293G>A	FBN1	15	48789463	C	T	15	48497266	C	T	TP	5extended	0.88	TP	36	TP	4.3264	TP	0.888	TP	0	FN	0.0489219	FN	0.950904	TP	5.86	TP	6	TP	1.63
NM_000138.4:c.1916G>A	FBN1	15	48797266	C	T	15	48505069	C	T	TN	exonic	0	TN	28.9	FP	0.114	TN	0.242	TN	0	TN	0.0232639	TN	0.433454	TN	0	TN	1	TN	0.125
NM_000138.4:c.1909T>C	FBN1	15	48797273	A	G	15	48505076	A	G	TN	exonic	0.01	TN	28.6	FP	0.2847	TN	0.188	TN	0	TN	0.116062	TN	0.443371	TN	0	TN	1	TN	0.135
NM_000138.4:c.1883G>A	FBN1	15	48797299	C	T	15	48505102	C	T	TN	exonic	0.02	TN	25.6	FP	0.1299	TN	0.18	TN	0	TN	0.0133118	TN	0.431849	TN	1.61	FP	2	TN	0.27
NM_000138.4:c.1846G>A	FBN1	15	48797336	C	T	15	48505139	C	T	TN	exonic	0	TN	32	FP	0.139	TN	0.152	TN	0	TN	0.138689	TN	0	TN	0	TN	1	TN	0.125
NM_000138.4:c.1633C>T	FBN1	15	48802322	G	A	15	48510125	G	A	TN	exonic	0	TN	32	FP	0.7889	TN	0.19	TN	0	TN	0.0215417	TN	0	TN	0	TN	1	TN	0.125
NM_000138.4:c.1595A>G	FBN1	15	48802360	T	C	15	48510163	T	C	TN	exonic	0	TN	26.5	FP	0.8558	TN	0.596	FP	0	TN	0.123126	TN	0	TN	8.18	FP	3	TN	0.375
NM_000138.4:c.1588G>A	FBN1	15	48805746	C	T	15	48513549	C	T	TN	5extended	0.25	FP	34	FP	0.9774	FP	0.987	FP	0	TN	0.373501	TN	0.943958	TN	5.48	FP	5	FP	0.875
NM_000138.4:c.1510T>C	FBN1	15	48805824	A	G	15	48513627	A	G	TN	exonic	0.03	TN	26.3	FP	0.184	TN	0.24	TN	0	TN	0.218492	TN	0.417366	TN	0	TN	1	TN	0.155
NM_000138.4:c.1426T>A	FBN1	15	48807626	A	T	15	48515429	A	T	TN	exonic	0.05	TN	27.4	FP	2.4547	FP	0.58	FP	0	TN	0.148549	TN	0.427236	TN	0	TN	3	TN	0.425
NM_000138.4:c.1169C>T	FBN1	15	48808538	G	A	15	48516341	G	A	TN	exonic	0.02	TN	24.1	FP	0.0439	TN	0.269	TN	0	TN	0.0245819	TN	0	TN	0	TN	1	TN	0.145
NM_000138.4:c.736G>A	FBN1	15	48829808	C	T	15	48537611	C	T	TP	5extended	0.77	TP	36	TP	3.9198	TP	0.984	TP	0	FN	0.306278	FN	0.970616	TP	6.45	TP	6	TP	1.52
NM_000138.4:c.640G>A	FBN1	15	48829904	C	T	15	48537707	C	T	TN	exonic	0	TN	29.5	FP	1.5707	FP	0.88	FP	0	TN	0.144175	TN	0.57408	TN	0	TN	3	TN	0.375
NM_000138.4:c.538+4A>G	FBN1	15	48888476	T	C	15	48596279	T	C	TN	5extended	0.23	FP	18.03	FP	29.8471	FP	0.953	FP	0.272566	FP	0.331362	TN	0.858856	TN	4.15	FP	6	FP	0.98
NM_000138.4:c.433T>C	FBN1	15	48892345	A	G	15	48600148	A	G	TN	exonic	0.09	TN	29	FP	0.2432	TN	0.292	TN	0	TN	0.317777	TN	0.405602	TN	0	TN	1	TN	0.215
NM_000138.4:c.364C>T	FBN1	15	48892414	G	A	15	48600217	G	A	TN	exonic	0.04	TN	28.8	FP	0.2548	TN	0.066	TN	0	TN	0.16958	TN	0.438191	TN	0	TN	1	TN	0.165
NM_000138.4:c.247+9A>G	FBN1	15	48905198	T	C	15	48613001	T	C	TP	5intronic	0.95	TP	13.43	TP	0.0644	FN	0.164	FN	0.52452	TP	0.199003	FN	0.45011	FN	6.59	TP	4	TP	1.45
NM_000138.4:c.184C>T	FBN1	15	48905270	G	A	15	48613073	G	A	TN	exonic	0	TN	32	FP	0.6185	TN	0.015	TN	0	TN	0.17554	TN	0.44382	TN	0	TN	1	TN	0.125
NM_004855.4:c.847-10A>G	PIGB	15	55632800	A	G	15	55340602	A	G	TP	3intronic	0.98	TP	28.2	TP	3.3836	TP	0.073	FN	0.748038	TP	2.32689	TP	0.93867	FN	8.38	TP	6	TP	1.73
NM_005902.3:c.802C>T	SMAD3	15	67473722	C	T	15	67181384	C	T	TN	exonic	0	TN	32	FP	0.5866	TN	0.316	TN	0	TN	0.0153593	TN	0.466601	TN	1.38	FP	2	TN	0.25
NM_001271.3:c.4138-6T>G	CHD2	15	93545401	T	G	15	93002171	T	G	TP	3intronic	0	FN	17.46	TP	0.6965	FN	0.491	TP	0.280798	TP	0.419845	FN	0.323588	FN	2.47	TP	4	TP	0.5
NM_000548.3:c.4492A>C	TSC2	16	2134715	A	C	16	2084714	A	C	TP	5extended	0.41	TP	33	TP	0.9067	FN	0.996	TP	0	FN	1.1142	FN	0.781621	FN	1.86	TP	4	TP	0.91
NM_001009944.2:c.1723-23T>C	PKD1	16	2166142	A	G	16	2116141	A	G	TN	3intronic	0.13	TN	8.385	FP	1.2661	FP	0.027	TN	0.012946	FP	0.757915	TN	0.0648712	TN	0	TN	3	TN	0.505
NM_024675.3:c.3201+5G>C	PALB2	16	23625320	C	G	16	23613999	C	G	TP	5extended	0.89	TP	23.7	TP	2.437	TP	0.941	TP	0.0437898	TP	0.406189	FN	0.911284	FN	4.95	TP	6	TP	1.64
NM_001605.2:c.2286G>A	AARS	16	70289631	C	T	16	70255728	C	T	TP	5extended	0.73	TP	24.7	TP	0.2112	FN	0.914	TP	0.0273699	TP	0.0559377	FN	0.88443	FN	3.71	TP	5	TP	1.355
NM_001142864.2:c.6963C>T	PIEZO1	16	88782855	G	A	16	88716447	G	A	TN	exonic	0.01	TN	0.621	TN	0.0488	TN	0.006	TN	0	TN	0.175138	TN	0	TN	0	TN	0	TN	0.01
NM_001142864.2:c.6651C>A	PIEZO1	16	88783440	G	T	16	88717032	G	T	TN	exonic	0	TN	0.023	TN	0.1327	TN	0.083	TN	0	TN	0.08468	TN	0.399847	TN	0	TN	0	TN	0
NM_001256182.1:c.5511G>A	ANKRD11	16	89347439	C	T	16	89281031	C	T	TN	exonic	0	TN	0.008	TN	0	TN	0.086	TN	0.014518	FP	3.97e-05	TN	0	TN	6.35	FP	2	TN	0.25
NM_000430.3:c.900+3A>G	PAFAH1B1	17	2577585	A	G	17	2674291	A	G	TP	5extended	0.24	TP	22.6	TP	0.5485	FN	0.652	TP	0.0286752	TP	2.20925	TP	0.925697	FN	5.03	TP	6	TP	0.99
NM_000430.3:c.1002+6T>A	PAFAH1B1	17	2579906	T	A	17	2676612	T	A	TP	5extended	0.36	TP	22.7	TP	2.069	TP	0.887	TP	0.0205295	TP	1.83975	FN	0.855275	FN	3.81	TP	6	TP	1.11
NM_000546.5:c.783-60G>A	TP53	17	7577215	C	T	17	7673897	C	T	TN	deep-intronic	0	TN	3.267	FP	0.8893	TN	0.091	FP	0	FP	0.00264052	TN	0.0503535	TN	6.86	FP	4	FP	0.5
NM_000546.5:c.623A>G	TP53	17	7578226	T	C	17	7674908	T	C	TN	exonic	0.04	TN	25.1	FP	3.5442	FP	0.414	TN	0	TN	0.0196488	TN	0.457338	TN	0	TN	2	TN	0.29
NM_000180.3:c.3043+5G>A	GUCY2D	17	7919164	G	A	17	8015846	G	A	TP	5extended	0.9357	TP	22.5	TP	22.61	TP	0.95	TP	0.342016	TP	4.78485	TP	0.998834	TP	7.6	TP	8	TP	1.9357
NM_005208.4:c.213C>T	CRYBA1	17	27577316	C	T	17	29250298	C	T	TP	5extended	0.7194	TP	21.2	TP	1.99	FN	0.967	TP	0.00263355	FN	1.39978	FN	0.591139	FN	0.123077	TP	4	TP	1.2194
NM_001042492.2:c.1062+3A>G	NF1	17	29527616	A	G	17	31200598	A	G	TP	5extended	0.54	TP	22.6	TP	21.6849	TP	0.58	TP	0.313274	TP	1.30096	FN	0.866354	FN	3.73	TP	6	TP	1.29
NM_001042492.2:c.7895A>G	NF1	17	29684312	A	G	17	31357294	A	G	TP	exonic	0.43	TP	32	TP	0.1168	FN	0.665	TP	0	FN	0.264163	FN	0.518323	FN	8.18	TP	4	TP	0.93
NM_007294.3:c.5453A>G	BRCA1	17	41199674	T	C	17	43047657	T	C	TP	exonic	0.39	TP	25.9	TP	11.4342	TP	0.094	FN	0	FN	0.712602	FN	0.425453	FN	0	FN	3	FN	0.765
NM_007294.3:c.5431C>A	BRCA1	17	41199696	G	T	17	43047679	G	T	TN	exonic	0.04	TN	24.7	FP	0.7761	TN	0.001	TN	0	TN	0.166426	TN	0.386159	TN	0	TN	1	TN	0.165
NM_007294.3:c.5425G>T	BRCA1	17	41199702	C	A	17	43047685	C	A	TN	exonic	0.13	TN	26.1	FP	2.2351	FP	0.011	TN	0	TN	0.241584	TN	0.394605	TN	1.85	FP	3	TN	0.505
NM_007294.3:c.5407G>T	BRCA1	17	41199720	C	A	17	43047703	C	A	TN	exonic	0.13	TN	27.8	FP	0.389	TN	0.501	FP	0	TN	0.840052	TN	0.755801	TN	1.29	FP	3	TN	0.505
NM_007294.3:c.5332+13G>T	BRCA1	17	41203067	C	A	17	43051050	C	A	TN	5intronic	0	TN	4.004	FP	0.1646	TN	0.144	TN	0.0784737	FP	0.208404	TN	0.428019	TN	1.16	FP	3	TN	0.375
NM_007294.3:c.5252G>A	BRCA1	17	41209094	C	T	17	43057077	C	T	TN	exonic	0	TN	28.8	FP	0.7465	TN	0.17	TN	0	TN	0.00149351	TN	0.371859	TN	0	TN	1	TN	0.125
NM_007294.3:c.5207T>C	BRCA1	17	41209139	A	G	17	43057122	A	G	TN	exonic	0	TN	27	FP	1.1636	FP	0.181	TN	0	TN	0.153119	TN	0.370654	TN	1.08	FP	3	TN	0.375
NM_007294.3:c.5198A>G	BRCA1	17	41209148	T	C	17	43057131	T	C	TN	exonic	0	TN	23.6	FP	0.2979	TN	0.06	TN	0	TN	0.118512	TN	0.376663	TN	0	TN	1	TN	0.125
NM_007294.3:c.5157G>T	BRCA1	17	41215386	C	A	17	43063369	C	A	TN	exonic	0.01	TN	14.2	FP	5.6149	FP	0.052	TN	0.0437761	FP	1.71883	TN	0.389556	TN	0	TN	3	TN	0.385
NM_007294.3:c.5153-26A>G	BRCA1	17	41215416	T	C	17	43063399	T	C	TP	3intronic	0.23	TP	16.11	TP	0.1904	FN	0.646	TP	0.995191	TP	1.67878	FN	0.071368	FN	6.6	TP	5	TP	0.855
NM_007294.3:c.5152+6T>C	BRCA1	17	41215885	A	G	17	43063868	A	G	TP	5extended	0.7	TP	23.7	TP	4.4061	TP	0.923	TP	0.209201	TP	0.311064	FN	0.866057	FN	3.63	TP	6	TP	1.45
NM_007294.3:c.5152+5G>C	BRCA1	17	41215886	C	G	17	43063869	C	G	TP	5extended	0.9	TP	26.3	TP	15.4491	TP	0.938	TP	0.839453	TP	0.385081	FN	0.97957	TP	6.24	TP	7	TP	1.775
NM_007294.3:c.5117G>A	BRCA1	17	41215926	C	T	17	43063909	C	T	TN	exonic	0.03	TN	28.4	FP	1.7255	FP	0.31	TN	0	TN	0.177793	TN	0.517985	TN	0	TN	2	TN	0.28
NM_007294.3:c.5096G>A	BRCA1	17	41215947	C	T	17	43063930	C	T	TN	exonic	0.15	TN	32	FP	4.675	FP	0.584	FP	0	TN	0.320908	TN	0.498619	TN	5.12	FP	4	FP	0.65
NM_007294.3:c.5075-6C>A	BRCA1	17	41215974	G	T	17	43063957	G	T	TN	3intronic	0.24	FP	12.63	FP	3.3382	FP	0.324	FP	0.196929	FP	0.88351	TN	0.260739	TN	2.03	FP	6	FP	0.99
NM_007294.3:c.5074+7T>C	BRCA1	17	41219618	G	G	17	43067601	G	G	TN	5intronic	0.04	TN	0	TN	0	TN	0	TN	0	TN	0	TN	0	TN	0	TN	0	TN	0.04
NM_007294.3:c.5024C>T	BRCA1	17	41219675	G	A	17	43067658	G	A	TN	exonic	0.04	TN	16.07	FP	0.3293	TN	0.049	TN	0	TN	0.139664	TN	0.508979	TN	0	TN	1	TN	0.165
NM_007294.3:c.4987-11T>C	BRCA1	17	41219723	A	G	17	43067706	A	G	TN	3intronic	0.26	FP	17.62	FP	2.3694	FP	0.201	TN	0.0252412	FP	0.837449	TN	0.118088	TN	0	TN	4	FP	0.76
NM_007294.3:c.4868C>G	BRCA1	17	41223063	G	C	17	43071046	G	C	TP	exonic	0.92	TP	17.94	TP	0.0124	FN	0.526	TP	0	FN	0.305148	FN	0	FN	6.28	TP	4	TP	1.42
NM_007294.3:c.4676-8C>G	BRCA1	17	41223263	G	C	17	43071246	G	C	TN	3intronic	0	TN	6.535	FP	0.0256	TN	0.307	FP	0.0698314	FP	0.739647	TN	0.184663	TN	1.63	FP	4	FP	0.5
NM_007294.3:c.4484+15T>C	BRCA1	17	41228490	A	G	17	43076473	A	G	TN	5intronic	0	TN	3.025	FP	0.1366	TN	0.052	TN	0.0641943	FP	0.0956619	TN	0.407473	TN	0	TN	2	TN	0.25
NM_007294.3:c.4393A>G	BRCA1	17	41228596	T	C	17	43076579	T	C	TN	exonic	0.11	TN	0.03	TN	0.0533	TN	0.271	TN	0	TN	0.168659	TN	0	TN	3.68	FP	1	TN	0.235
NM_007294.3:c.4357+6T>C	BRCA1	17	41234415	A	G	17	43082398	A	G	TP	5extended	0.04	FN	15.15	TP	17.4588	TP	0.904	TP	0.0114189	TP	0.0533776	FN	0.641295	FN	0	FN	4	TP	0.54
NM_007294.3:c.4343G>A	BRCA1	17	41234435	C	T	17	43082418	C	T	TN	exonic	0	TN	2.35	TN	1.0756	FP	0.049	TN	0	TN	0.0695789	TN	0.426742	TN	0	TN	1	TN	0.125
NM_007294.3:c.3845A>T	BRCA1	17	41243703	T	A	17	43091686	T	A	TN	exonic	0.02	TN	25.7	FP	0.0177	TN	0.604	FP	0	TN	0.140945	TN	0	TN	7.78	FP	3	TN	0.395
NM_007294.3:c.3047A>G	BRCA1	17	41244501	T	C	17	43092484	T	C	TN	exonic	0	TN	0.262	TN	0.1978	TN	0.264	TN	0	TN	0.00103471	TN	0	TN	3.36	FP	1	TN	0.125
NM_007294.3:c.1731A>G	BRCA1	17	41245817	T	C	17	43093800	T	C	TN	exonic	0	TN	6.871	TN	0.0594	TN	0.229	TN	0.0322797	FP	0.0137561	TN	0	TN	0	TN	1	TN	0.125
NM_007294.3:c.612G>C	BRCA1	17	41247921	C	G	17	43095904	C	G	TN	exonic	0.01	TN	19.17	FP	0.8898	TN	0.046	TN	0	TN	0.0787929	TN	0.0493231	TN	1.19	FP	2	TN	0.26
NM_007294.3:c.509G>A	BRCA1	17	41251830	C	T	17	43099813	C	T	TN	exonic	0.02	TN	11.07	FP	0.1941	TN	0.339	TN	0	TN	0.286441	TN	0.412175	TN	0	TN	1	TN	0.145
NM_007294.3:c.286G>C	BRCA1	17	41256900	C	G	17	43104883	C	G	TN	exonic	0.14	TN	27.2	FP	0.7563	TN	0.383	TN	0	TN	0.0475575	TN	0.485111	TN	1.33	FP	2	TN	0.39
NM_007294.3:c.286G>A	BRCA1	17	41256900	C	T	17	43104883	C	T	TN	exonic	0.06	TN	32	FP	1.219	FP	0.361	TN	0	TN	0.862811	TN	0.515536	TN	0	TN	2	TN	0.31
NM_007294.3:c.213-5T>G	BRCA1	17	41256978	A	C	17	43104961	A	C	TP	3intronic	0.76	TP	24.2	TP	1.6416	TP	0.62	TP	0.759029	TP	1.95024	FN	0.624035	FN	3.47	TP	6	TP	1.51
NM_007294.3:c.213-14C>G	BRCA1	17	41256987	G	C	17	43104970	G	C	TP	3intronic	0.69	TP	23	TP	0.0392	FN	0.468	TP	0.72568	TP	1.16181	FN	0.456645	FN	2.61	TP	5	TP	1.315
NM_007294.3:c.212G>T	BRCA1	17	41258473	C	A	17	43106456	C	A	TP	5extended	0.65	TP	36	TP	5.665	TP	0.87	TP	0	FN	0.4257	FN	0.961952	TP	7.84	TP	6	TP	1.4
NM_007294.3:c.189A>T	BRCA1	17	41258496	T	A	17	43106479	T	A	TN	exonic	0.32	FP	24.1	FP	0.9621	FP	0.92	FP	0	TN	0.199791	TN	0.620146	TN	0	TN	4	FP	0.82
NM_007294.3:c.134+3A>T	BRCA1	17	41267740	T	A	17	43115723	T	A	TP	5extended	0.83	TP	24.4	TP	14.5275	TP	0.789	TP	0.632912	TP	0.302896	FN	0.935669	FN	5.86	TP	6	TP	1.58
NM_007294.3:c.81-14C>T	BRCA1	17	41267810	G	A	17	43115793	G	A	TN	3intronic	0	TN	0.039	FP	0.1384	TN	0.101	TN	0.0264921	FP	0.218944	TN	0.0519381	TN	0	TN	2	TN	0.25
NM_007294.3:c.81-65G>C	BRCA1	17	41267861	C	G	17	43115844	C	G	TN	deep-intronic	0	TN	0.123	FP	0.0389	TN	0.018	FP	0	FP	8.5e-05	TN	0.0505374	TN	0	TN	3	TN	0.375
NM_007294.3:c.36A>G	BRCA1	17	41276078	T	C	17	43124061	T	C	TN	exonic	0.04	TN	11.45	FP	5.6228	FP	0.211	TN	0.0461323	FP	0.268114	TN	0.398351	TN	0	TN	3	TN	0.415
NM_007294.3:c.19C>T	BRCA1	17	41276095	G	A	17	43124078	G	A	TN	exonic	0.15	TN	23.9	FP	3.705	FP	0.052	TN	0	TN	0.345089	TN	0.419434	TN	0	TN	2	TN	0.4
NM_015443.3:c.2725-5T>G	KANSL1	17	44110563	A	C	17	46033197	A	C	TP	3intronic	0.61	TP	22.8	TP	2.4501	TP	0.488	TP	0.141	TP	1.71074	FN	0.380188	FN	2.43	TP	6	TP	1.36
NM_015443.3:c.1848G>A	KANSL1	17	44143903	C	T	17	46066537	C	T	TP	5extended	0.5	TP	23.8	TP	0.4523	FN	0.995	TP	0.01644	TP	0.194234	FN	0.987541	TP	7.13	TP	6	TP	1.25
NM_005993.4:c.1922G>C	TBCD	17	80863929	G	C	17	82906053	G	C	TP	5extended	0.81	TP	33	TP	2.9475	TP	0.933	TP	0	FN	3.72772	TP	0.961088	TP	6.05	TP	7	TP	1.685
NM_007254.3:c.578+4A>G	PNKP	19	50367577	T	C	19	49864320	T	C	TP	5extended	0.32	TP	22.3	TP	12.419	TP	0.898	TP	0.04029	TP	0.140691	FN	0.946658	FN	8.19	TP	6	TP	1.07
NM_001308632.1:c.1620C>T	POLD1	19	50910365	C	T	19	50407108	C	T	TN	exonic	0	TN	9.536	FP	0.9863	FP	0.357	TN	0.019355	FP	0.150485	TN	0.430123	TN	3.45	FP	4	FP	0.5
NM_015629.3:c.528-38C>T	PRPF31	19	54627090	C	T	19	54123711	C	T	TN	3intronic	0.0031	TN	0.627	FP	0.33	TN	0.479	FP	0.00185217	TN	0.269781	TN	0.0515155	TN	6.7	FP	3	TN	0.3781
NM_018848.3:c.803T>G	MKKS*	20	10393360	A	C	20	10412712	A	C	TN	exonic	0.01	TN	27.1	FP	0.5756	TN	0.465	FP	0	TN	0.00768367	TN	0	TN	0	TN	2	TN	0.26
NM_018848.3:c.749G>A	MKKS*	20	10393414	C	T	20	10412766	C	T	TN	exonic	0	TN	27.8	FP	0.1494	TN	0.04	TN	0	TN	2.67e-05	TN	0	TN	4.21	FP	2	TN	0.25
NM_015600.4:c.867+5G>A	ABHD12	20	25288597	C	T	20	25307961	C	T	TP	5extended	0.7638	TP	15.4	TP	2.28	FN	0.935	TP	0.0297351	TP	3.49709	TP	0.970834	TP	0	FN	6	TP	1.5138
NM_001098.2:c.526-642C>T	ACO2	22	41910739	C	T	22	41514735	C	T	TN	deep-intronic	0	TN	0.246	TN	0	TN	0.064	TN	0	TN	0	TN	0	TN	0	TN	0	TN	0
NM_001034853.1:c.1754-3G>C	RPGR	X	38146501	G	G	X	38287248	G	G	TP	3intronic	0.4239	TP	13.65	TP	0	FN	0.525	TP	0	FN	0.00064803	FN	0.999814	TP	4.2	TP	5	TP	1.0489
NM_001034853.1:c.247G>T	RPGR	X	38182106	C	A	X	38322853	C	A	TP	5extended	0.6845	TP	23.2	TP	0	FN	0.939	TP	0	FN	5.10218	TP	0.998891	TP	5.3	TP	6	TP	1.4345
NM_001399.4:c.957C>G	EDA	X	69255240	C	G	X	70035390	C	G	TN	exonic	0	TN	26.3	FP	0	TN	0.673	FP	0	TN	0.140771	TN	0	TN	8.27	FP	3	TN	0.375
NM_001286074.1:c.488C>A	TAF1	X	70595092	C	A	X	71375242	C	A	TN	exonic	0.12	TN	22.3	FP	0.8844	TN	0.429	FP	0	TN	0.118191	TN	0.382305	TN	7.22	FP	3	TN	0.495
NM_004208.3:c.697-27T>G	AIFM1	X	129274619	A	C	X	130140644	A	C	TP	3intronic	0.15	FN	15.45	TP	0.2217	FN	0.298	TP	0.00540669	FN	0.554821	FN	0.0469571	FN	0	FN	2	FN	0.4
NM_001110556.1:c.2747A>T	FLNA	X	153590426	T	A	X	154362058	T	A	TN	exonic	0	TN	23.9	FP	0.0384	TN	0.022	TN	0	TN	0.016893	TN	0.450837	TN	0	TN	1	TN	0.125
NM_001363.3:c.915+10G>A	DKC1	X	153997595	G	A	X	154769320	G	A	TP	5intronic	0.87	TP	12.79	TP	0.0883	FN	0.083	FN	0.664267	TP	1.51135	FN	0.453599	FN	3.89	TP	4	TP	1.37

## Sheet: Sheet1
1	AARS	Soton	c.2286G>A	p.(=)	NM_001605.2:c.2286G>A	chr16	70289631	70255728	-	D-1		1	TP	5extended	TRUE
2	ADAMTSL4	Soton	c.2559G>A	p.(=)	NM_019032.5:c.2559G>A	chr1	150531125	150558649	+	D-1		2	TP	5extended	TRUE
3	AIFM1	Soton	c.697-27T>G	N/A	NM_004208.3:c.697-27T>G	chrX	129274619	130140644	-	A-27		3	TP	3intronic	TRUE
4	ANKRD11	Soton	c.5511G>A	p.(=)	NM_001256182.1:c.5511G>A	chr16	89347439	89281031	-	D-1960		4	TN	exonic	TRUE
5	APC	Soton	c.295C>T	p.(Arg99Trp)	NM_001354896.1:c.295C>T	chr5	112102960	112767263	+	A+75		5	TN	exonic	TRUE
6	APC	Soton	c.1549-8A>G	N/A	NM_000038.5:c.1549-8A>G	chr5	112163618	112827921	+	A-8		6	TP	3intronic	TRUE
7	BRCA1	Soton	c.19C>T	p.(Arg7Cys)	NM_007294.3:c.19C>T	chr17	41276095	43124078	-	A+38		7	TN	exonic	TRUE
8	BRCA1	Soton	c.36A>G	p.(=)	NM_007294.3:c.36A>G	chr17	41276078	43124061	-	D-45		8	TN	exonic	TRUE
9	BRCA1	Soton	c.81-65G>C	N/A	NM_007294.3:c.81-65G>C	chr17	41267861	43115844	-	A-65		9	TN	deep-intronic	TRUE
10	BRCA1	Soton	c.81-14C>T	N/A	NM_007294.3:c.81-14C>T	chr17	41267810	43115793	-	A-14		10	TN	3intronic	TRUE
11	BRCA1	Soton	c.134+3A>T	N/A	NM_007294.3:c.134+3A>T	chr17	41267740	43115723	-	D+3		11	TP	5extended	TRUE
12	BRCA1	Soton	c.189A>T	p.(Leu63Phe)	NM_007294.3:c.189A>T	chr17	41258496	43106479	-	D-24		12	TN	exonic	TRUE
13	BRCA1	Soton	c.212G>T	p.(Arg71Met)	NM_007294.3:c.212G>T	chr17	41258473	43106456	-	D-1		13	TP	5extended	TRUE
14	BRCA1	Soton	c.213-14C>G	N/A	NM_007294.3:c.213-14C>G	chr17	41256987	43104970	-	A-14		14	TP	3intronic	TRUE
15	BRCA1	Soton	c.213-5T>G	N/A	NM_007294.3:c.213-5T>G	chr17	41256978	43104961	-	A-5		15	TP	3intronic	TRUE
16	BRCA1	Soton	c.286G>C	p.(Asp96His)	NM_007294.3:c.286G>C	chr17	41256900	43104883	-	D-16		16	TN	exonic	TRUE
17	BRCA1	Soton	c.286G>A	p.(Asp96Asn)	NM_007294.3:c.286G>A	chr17	41256900	43104883	-	D-16		17	TN	exonic	TRUE
18	BRCA1	Soton	c.509G>A	p.(Arg170Gln)	NM_007294.3:c.509G>A	chr17	41251830	43099813	-	D-39		18	TN	exonic	TRUE
19	BRCA1	Soton	c.612G>C	p.(Leu204Phe)	NM_007294.3:c.612G>C	chr17	41247921	43095904	-	A+19		19	TN	exonic	TRUE
20	BRCA1	Soton	c.1731A>G	p.(=)	NM_007294.3:c.1731A>G	chr17	41245817	43093800	-	A+1061		20	TN	exonic	TRUE
21	BRCA1	Soton	c.3047A>G	p.(Asn1016Ser)	NM_007294.3:c.3047A>G	chr17	41244501	43092484	-	D-1050		21	TN	exonic	TRUE
22	BRCA1	Soton	c.3845A>T	p.(Glu1282Val)	NM_007294.3:c.3845A>T	chr17	41243703	43091686	-	D-252		22	TN	exonic	TRUE
23	BRCA1	Soton	c.4343G>A	p.(Ser1448Asn)	NM_007294.3:c.4343G>A	chr17	41234435	43082418	-	D-15		23	TN	exonic	TRUE
24	BRCA1	Soton	c.4357+6T>C	N/A	NM_007294.3:c.4357+6T>C	chr17	41234415	43082398	-	D+6		24	TP	5extended	TRUE
26	BRCA1	Soton	c.4393A>G	p.(Ile465Val)	NM_007294.3:c.4393A>G	chr17	41228596	43076579	-	A+36		26	TN	exonic	TRUE
27	BRCA1	Soton	c.4484+15T>C	N/A	NM_007294.3:c.4484+15T>C	chr17	41228490	43076473	-	D+15		27	TN	5intronic	TRUE
28	BRCA1	Soton	c.4676-8C>G	N/A	NM_007294.3:c.4676-8C>G	chr17	41223263	43071246	-	A-8		28	TN	3intronic	TRUE
29	BRCA1	Soton	c.4868C>G	p.(Ala1623Gly)	NM_007294.3:c.4868C>G	chr17	41223063	43071046	-	D-119		29	TP	exonic	TRUE
31	BRCA1	Soton	c.4987-11T>C	N/A	NM_007294.3:c.4987-11T>C	chr17	41219723	43067706	-	A-11		31	TN	3intronic	TRUE
32	BRCA1	Soton	c.5074+7T>C	N/A	NM_007294.3:c.5074+7T>C	chr17	41219675	43067658	-	D+7		32	TN	5intronic	TRUE
33	BRCA1	Soton	c.5024C>T	p.(Thr1675Ile)	NM_007294.3:c.5024C>T	chr17	41219675	43067658	-	A+38		33	TN	exonic	TRUE
34	BRCA1	Soton	c.5075-6C>A	N/A	NM_007294.3:c.5075-6C>A	chr17	41215974	43063957	-	A-6		34	TN	3intronic	TRUE
35	BRCA1	Soton	c.5096G>A	p.(Arg1699Gln)	NM_007294.3:c.5096G>A	chr17	41215947	43063930	-	A+22		35	TN	exonic	TRUE
36	BRCA1	Soton	c.5117G>A	p.(Gly1706Glu)	NM_007294.3:c.5117G>A	chr17	41215926	43063909	-	D-36		36	TN	exonic	TRUE
37	BRCA1	Soton	c.5152+5G>C	N/A	NM_007294.3:c.5152+5G>C	chr17	41215886	43063869	-	D+5		37	TP	5extended	TRUE
38	BRCA1	Soton	c.5152+6T>C	N/A	NM_007294.3:c.5152+6T>C	chr17	41215885	43063868	-	D+6		38	TP	5extended	TRUE
39	BRCA1	Soton	c.5153-26A>G	N/A	NM_007294.3:c.5153-26A>G	chr17	41215416	43063399	-	A-26		39	TP	3intronic	TRUE
40	BRCA1	Soton	c.5157G>T	p.(=)	NM_007294.3:c.5157G>T	chr17	41215386	43063369	-	A+5		40	TN	exonic	TRUE
41	BRCA1	Soton	c.5198A>G	p.(Asp1733Gly)	NM_007294.3:c.5198A>G	chr17	41209148	43057131	-	A+5		41	TN	exonic	TRUE
42	BRCA1	Soton	c.5207T>C	p.(Val1736Ala)	NM_007294.3:c.5207T>C	chr17	41209139	43057122	-	A+14		42	TN	exonic	TRUE
43	BRCA1	Soton	c.5252G>A	p.(Arg1751Gln)	NM_007294.3:c.5252G>A	chr17	41209094	43057077	-	D-26		43	TN	exonic	TRUE
44	BRCA1	Soton	c.5332+13G>T	N/A	NM_007294.3:c.5332+13G>T	chr17	41203067	43051050	-	D+13		44	TN	5intronic	TRUE
45	BRCA1	Soton	c.5407G>T	p.(Gly1803Cys)	NM_007294.3:c.5407G>T	chr17	41199720	43047703	-	A+1		45	TN	exonic	TRUE
46	BRCA1	Soton	c.5425G>T	p.(Val1809Phe)	NM_007294.3:c.5425G>T	chr17	41199702	43047685	-	A+19		46	TN	exonic	TRUE
47	BRCA1	Soton	c.5431C>A	p.(Gln1811Lys)	NM_007294.3:c.5431C>A	chr17	41199696	43047679	-	A+25		47	TN	exonic	TRUE
48	BRCA1	Soton	c.5453A>G	p.(Asp1818Gly)	NM_007294.3:c.5453A>G	chr17	41199674	43047657	-	D-15		48	TP	exonic	TRUE
49	BRCA2	Soton	c.79A>G	p.(Ile27Val)	NM_000059.3:c.79A>G	chr13	32893225	32319088	+	A+12		49	TN	exonic	TRUE
50	BRCA2	Soton	c.167A>C	p.(Asn56Thr)	NM_000059.3:c.167A>C	chr13	32893313	32319176	+	A+100		50	TN	exonic	TRUE
51	BRCA2	Soton	c.223G>C	p.(Ala75Pro)	NM_000059.3:c.223G>C	chr13	32893369	32319232	+	D-94		51	TN	exonic	TRUE
52	BRCA2	Soton	c.280C>T	p.(Pro94Ser)	NM_000059.3:c.280C>T	chr13	32893426	32319289	+	D-37		52	TN	exonic	TRUE
53	BRCA2	Soton	c.441A>G	p.(=)	NM_000059.3:c.441A>G	chr13	32900253	32326116	+	A+16		53	TN	exonic	TRUE
55	BRCA2	Soton	c.506A>G	p.(Lys169Arg)	NM_000059.3:c.506A>G	chr13	32900409	32326272	+	D-11		55	TN	exonic	TRUE
56	BRCA2	Soton	c.520C>T	p.(Arg174Cys)	NM_000059.3:c.520C>T	chr13	32900639	32326502	+	A+4		56	TP	exonic	TRUE
57	BRCA2	Soton	c.598A>G	p.(Thr200Ala)	NM_000059.3:c.598A>G	chr13	32900717	32326580	+	D-34		57	TN	exonic	TRUE
58	BRCA2	Soton	c.632-3C>G	N/A	NM_000059.3:c.632-3C>G	chr13	32903577	32329440	+	A-3		58	TP	3intronic	TRUE
60	BRCA2	Soton	c.772C>A	p.(Gln258Lys)	NM_000059.3:c.772C>A	chr13	32905146	32331009	+	D-22		60	TN	exonic	TRUE
61	BRCA2	Soton	c.1127T>G	p.(Phe376Val)	NM_000059.3:c.1127T>G	chr13	32906742	32332605	+	A+334		61	TN	exonic	TRUE
62	BRCA2	Soton	c.1291A>C	p.(Thr431Pro)	NM_000059.3:c.1291A>C	chr13	32906906	32332769	+	A+498		62	TN	exonic	TRUE
63	BRCA2	Soton	c.1480G>A	p.(Val494Met)	NM_000059.3:c.1480G>A	chr13	32907095	32332958	+	D-430		63	TN	exonic	TRUE
64	BRCA2	Soton	c.1804G>A	p.(Gly602Arg)	NM_000059.3:c.1804G>A	chr13	32907419	32333282	+	D-106		64	TN	exonic	TRUE
65	BRCA2	Soton	c.1936A>C	p.(Ser646Arg)	NM_000059.3:c.1936A>C	chr13	32910428	32336291	+	A+27		65	TN	exonic	TRUE
66	BRCA2	Soton	c.2803G>C	p.(Asp935His)	NM_000059.3:c.2803G>C	chr13	32911295	32337158	+	A+894		66	TN	exonic	TRUE
67	BRCA2	Soton	c.2810A>C	p.(Gln937Pro)	NM_000059.3:c.2810A>C	chr13	32911302	32337165	+	A+901		67	TN	exonic	TRUE
68	BRCA2	Soton	c.3032C>G	p.(Thr1011Arg)	NM_000059.3:c.3032C>G	chr13	32911524	32337387	+	A+1123		68	TN	exonic	TRUE
69	BRCA2	Soton	c.3073A>G	p.(Lys1025Glu)	NM_000059.3:c.3073A>G	chr13	32911565	32337428	+	A+1164		69	TN	exonic	TRUE
71	BRCA2	Soton	c.6938-4C>T	N/A	NM_000059.3:c.6938-4C>T	chr13	32920960	32346823	+	A-4		71	TN	3intronic	TRUE
72	BRCA2	Soton	c.7021C>T	p.(Arg2341Cys)	NM_000059.3:c.7021C>T	chr13	32929011	32354874	+	A+14		72	TN	exonic	TRUE
73	BRCA2	Soton	c.7610A>G	p.(His2537Arg)	NM_000059.3:c.7610A>G	chr13	32930739	32356602	+	D-8		73	TN	exonic	TRUE
74	BRCA2	Soton	c.7822C>G	p.(Pro2608Ala)	NM_000059.3:c.7822C>G	chr13	32936676	32362539	+	A+17		74	TN	exonic	TRUE
75	BRCA2	Soton	c.8192A>G	p.(Gln2731Arg)	NM_000059.3:c.8192A>G	chr13	32937531	32363394	+	D-140		75	TN	exonic	TRUE
76	BRCA2	Soton	c.8258T>C	p.(Leu2753Pro)	NM_000059.3:c.8258T>C	chr13	32937597	32363460	+	D-74		76	TN	exonic	TRUE
78	BRCA2	Soton	c.8378G>T	p.(Gly2793Val)	NM_000059.3:c.8378G>T	chr13	32944585	32370448	+	A+47		78	TP	exonic	TRUE
79	BRCA2	Soton	c.8486A>G	p.(Gln2829Arg)	NM_000059.3:c.8486A>G	chr13	32944693	32370556	+	D-2		79	TP	5extended	TRUE
80	BRCA2	Soton	c.8963G>A	p.(Ser2988Asn)	NM_000059.3:c.8963G>A	chr13	32953896	32379759	+	A+10		80	TN	exonic	TRUE
81	BRCA2	Soton	c.9104A>C	p.(Tyr3035Ser)	NM_000059.3:c.9104A>C	chr13	32954037	32379900	+	D-14		81	TN	exonic	TRUE
82	BRCA2	Soton	c.9104A>G	p.(Tyr3035Cys)	NM_000059.3:c.9104A>G	chr13	32954037	32379900	+	D-14		82	TN	exonic	TRUE
83	BRCA2	Soton	c.9242T>C	p.(Val3081Ala)	NM_000059.3:c.9242T>C	chr13	32954268	32380131	+	D-15		83	TN	exonic	TRUE
84	BRCA2	Soton	c.9367A>G	p.(Ser3128Gly)	NM_000059.3:c.9367A>G	chr13	32968936	32394799	+	A+111		84	TN	exonic	TRUE
85	BRCA2	Soton	c.9456G>T	p.(Glu3152Asp)	NM_000059.3:c.9456G>T	chr13	32969025	32394888	+	D-46		85	TN	exonic	TRUE
86	BRCA2	Soton	c.9502-13C>G	N/A	NM_000059.3:c.9502-13C>G	chr13	32971022	32396885	+	A-13		86	TN	3intronic	TRUE
87	BRCA2	Soton	c.9586A>G	p.(Lys3196Glu)	NM_000059.3:c.9586A>G	chr13	32971119	32396982	+	D-63		87	TN	exonic	TRUE
88	BRCA2	Soton	c.9604C>T	p.(Pro3202Ser)	NM_000059.3:c.9604C>T	chr13	32971137	32397000	+	D-45		88	TN	exonic	TRUE
89	BRCA2	Soton	c.10045A>G	p.(Thr3349Ala)	NM_000059.3:c.10045A>G	chr13	32972695	32398558	+	A+367		89	TN	exonic	TRUE
90	BRCA2	Soton	c.10249 T>C	p. (Tyr3417 His)	NM_000059.3:c.10249T>C	chr13	32972899	32398762	+	A+601		90	TN	exonic	TRUE
91	CHD2	Soton	c.4138-6T>G	N/A	NM_001271.3:c.4138-6T>G	chr15	93545401	93002171	+	A-6		91	TP	3intronic	TRUE
92	COL11A2	Soton	c.2682G>A	p.(=)	NM_080680.2:c.2682G>A	chr6	33141279	33173502	-	A+42		92	TN	exonic	TRUE
93	COL3A1	Soton	c.3133G>A	p.(Ala1045Thr)	NM_000090.3:c.3133G>A	chr2	189871110	189006384	+	A+40		93	TN	exonic	TRUE
94	COL3A1	Soton	c.1815+5G>A	N/A	NM_000090.3:c.1815+5G>A	chr2	189861949	188997223	+	D+5		94	TN	5extended	TRUE
96	COL5A1	Soton	c.1195G>A	p.(Gly399Ser)	NM_000093.3:c.1195G>A	chr9	137623372	134731526	+	A+31		96	TN	exonic	TRUE
98	DICER1	Soton	c.1509G>A	p.(=)	NM_030621.4:c.1509G>A	chr14	95583959	95117622	-	D-1		98	TP	5extended	TRUE
99	DKC1	Soton	c.915+10G>A	N/A	NM_001363.3:c.915+10G>A	chrX	153997595	154769320	+	D+10		99	TP	5intronic	TRUE
100	EDA	Soton	c.957C>G	p.(Ser319Arg)	NM_001399.4:c.957C>G	chrX	69255240	70035390	+	A+33		100	TN	exonic	TRUE
101	ENPP1	Soton	c.241G>T	p.(Val81Leu)	NM_006208.2:c.241G>T	chr6	132168916	131847776	+	A+1		101	TP	exonic	TRUE
102	FBN1	Soton	c.184C>T	p.(Arg62Cys)	NM_000138.4:c.184C>T	chr15	48905270	48613073	-	A+20		102	TN	exonic	TRUE
103	FBN1	Soton	c.247+9A>G	N/A	NM_000138.4:c.247+9A>G	chr15	48905198	48613001	-	D+9		103	TP	5intronic	TRUE
104	FBN1	Soton	c.364C>T	p.(Arg122Cys)	NM_000138.4:c.364C>T	chr15	48892414	48600217	-	A+18		104	TN	exonic	TRUE
105	FBN1	Soton	c.433T>C	p.(Cys145Arg)	NM_000138.4:c.433T>C	chr15	48892345	48600148	-	D-10		105	TN	exonic	TRUE
107	FBN1	Soton	c.538+4A>G	N/A	NM_000138.4:c.538+4A>G	chr15	48888476	48596279	-	D+4		107	TN	5extended	TRUE
108	FBN1	Soton	c.640G>A	p.(Gly214Ser)	NM_000138.4:c.640G>A	chr15	48829904	48537707	-	A+102		108	TN	exonic	TRUE
109	FBN1	Soton	c.736G>A	p.(=)	NM_000138.4:c.736G>A	chr15	48829808	48537611	-	D-1		109	TP	5extended	TRUE
112	FBN1	Soton	c.1169C>T	p.(Ser390Phe)	NM_000138.4:c.1169C>T	chr15	48808538	48516341	-	A+22		112	TN	exonic	TRUE
113	FBN1	Soton	c.1426T>A	p.(Cys476Ser)	NM_000138.4:c.1426T>A	chr15	48807626	48515429	-	D-43		113	TN	exonic	TRUE
114	FBN1	Soton	c.1510T>C	p.(Cys504Arg)	NM_000138.4:c.1510T>C	chr15	48805824	48513627	-	A+42		114	TN	exonic	TRUE
115	FBN1	Soton	c.1588G>A	p.(Asp530Asn)	NM_000138.4:c.1588G>A	chr15	48805746	48513549	-	D-1		115	TN	5extended	TRUE
116	FBN1	Soton	c.1595A>G	p.(Asp532Gly)	NM_000138.4:c.1595A>G	chr15	48802360	48510163	-	A+7		116	TN	exonic	TRUE
117	FBN1	Soton	c.1633C>T	p.(Arg545Cys)	NM_000138.4:c.1633C>T	chr15	48802322	48510125	-	A+45		117	TN	exonic	TRUE
118	FBN1	Soton	c.1846G>A	p.(Glu616Lys)	NM_000138.4:c.1846G>A	chr15	48797336	48505139	-	A+9		118	TN	exonic	TRUE
119	FBN1	Soton	c.1883G>A	p.(Cys628Tyr)	NM_000138.4:c.1883G>A	chr15	48797299	48505102	-	A+46		119	TN	exonic	TRUE
120	FBN1	Soton	c.1909T>C	p.(Cys637Arg)	NM_000138.4:c.1909T>C	chr15	48797273	48505076	-	D-52		120	TN	exonic	TRUE
121	FBN1	Soton	c.1916G>A	p.(Cys639Tyr)	NM_000138.4:c.1916G>A	chr15	48797266	48505069	-	D-45		121	TN	exonic	TRUE
122	FBN1	Soton	c.2293G>A	p.(Asp765Asn)	NM_000138.4:c.2293G>A	chr15	48789463	48497266	-	D-1		122	TP	5extended	TRUE
123	FBN1	Soton	c.2369G>A	p.(Cys2369Tyr)	NM_000138.4:c.2369G>A	chr15	48788347	48496150	-	D-51		123	TN	exonic	TRUE
124	FBN1	Soton	c.2638G>A	p.(Gly880Ser)	NM_000138.4:c.2638G>A	chr15	48787359	48495162	-	D-40		124	TN	exonic	TRUE
125	FBN1	Soton	c.2645C>T	p.(Ala882Val)	NM_000138.4:c.2645C>T	chr15	48787352	48495155	-	D-33		125	TN	exonic	TRUE
126	FBN1	Soton	c.2927G>A	p.(Arg976His)	NM_000138.4:c.2927G>A	chr15	48782203	48490006	-	A+73		126	TN	exonic	TRUE
127	FBN1	Soton	c.2952C>A	p.(Val984Val)	NM_000138.4:c.2952C>A	chr15	48782178	48489981	-	A+98		127	TN	exonic	TRUE
128	FBN1	Soton	c.2953G>A	p.(Gly985Arg)	NM_000138.4:c.2953G>A	chr15	48782177	48489980	-	A+99		128	TN	exonic	TRUE
129	FBN1	Soton	c.3124G>C	p.(Gly1042Arg)	NM_000138.4:c.3124G>C	chr15	48780649	48488452	-	A+42		129	TN	exonic	TRUE
130	FBN1	Soton	c.3197G>C	p.(Arg1066Thr)	NM_000138.4:c.3197G>C	chr15	48780576	48488379	-	D-12		130	TN	exonic	TRUE
131	FBN1	Soton	c.3209-13T>A	N/A	NM_000138.4:c.3209-13T>A	chr15	48780451	48488254	-	A-13		131	TP	3intronic	TRUE
132	FBN1	Soton	c.3268C>T	p.(Pro1090Ser)	NM_000138.4:c.3268C>T	chr15	48780379	48488182	-	A+60		132	TN	exonic	TRUE
133	FBN1	Soton	c.3332G>A	p.(Cys1111Tyr)	NM_000138.4:c.3332G>A	chr15	48780315	48488118	-	D-6		133	TN	exonic	TRUE
134	FBN1	Soton	c.3344A>G	p.(Asp1115Gly)	NM_000138.4:c.3344A>G	chr15	48779628	48487431	-	A+7		134	TN	exonic	TRUE
135	FBN1	Soton	c.3463+3A>G	N/A	NM_000138.4:c.3463+3A>C	chr15	48779506	48487309	-	D+3		135	TN	5extended	TRUE
136	FBN1	Soton	c.3509G>A	p.(Arg1170His)	NM_000138.4:c.3509G>A	chr15	48779352	48487155	-	A+46		136	TN	exonic	TRUE
137	FBN1	Soton	c.3533A>G	p.(Tyr1178Cys)	NM_000138.4:c.3533A>G	chr15	48779328	48487131	-	D-57		137	TN	exonic	TRUE
138	FBN1	Soton	c.3712G>A	p.(Asp1238Asn)	NM_000138.4:c.3712G>A	chr15	48777571	48485374	-	D-1		138	TN	5extended	TRUE
140	FBN1	Soton	c.3772C>T	p.(Pro1258Ser)	NM_000138.4:c.3772C>T	chr15	48776081	48483884	-	A+60		140	TN	exonic	TRUE
141	FBN1	Soton	c.3963A>G	p.(=)	NM_000138.4:c.3963A>G	chr15	48773853	48481656	-	D-2		141	TN	5extended	TRUE
142	FBN1	Soton	c.3964G>C	p.(Asp1322His)	NM_000138.4:c.3964G>C	chr15	48773852	48481655	-	D-1		142	TP	5extended	TRUE
143	FBN1	Soton	c.3974A>T	p.(Glu1325Val)	NM_000138.4:c.3974A>T	chr15	48766838	48474641	-	A+10		143	TN	exonic	TRUE
144	FBN1	Soton	c.4027G>A	p.(Ala1343Thr)	NM_000138.4:c.4027G>A	chr15	48766785	48474588	-	D-61		144	TN	exonic	TRUE
145	FBN1	Soton	c.4031G>A	p.(Gly1344Glu)	NM_000138.4:c.4031G>A	chr15	48766781	48474584	-	D-57		145	TN	exonic	TRUE
146	FBN1	Soton	c.4096G>A	p.(Glu1366Lys)	NM_000138.4:c.4096G>A	chr15	48766566	48474369	-	A+9		146	TN	exonic	TRUE
148	FBN1	Soton	c.4343A>G	p.(Asp1448Gly)	NM_000138.4:c.4343A>G	chr15	48762947	48470750	-	A+7		148	TN	exonic	TRUE
149	FBN1	Soton	c.4582G>T	p.(Asp1528Tyr)	NM_000138.4:c.4582G>T	chr15	48760609	48468412	-	D-1		149	TP	5extended	TRUE
151	FBN1	Soton	c.4747+5G>A	N/A	NM_000138.4:c.4747+5G>A	chr15	48760130	48467933	-	D+5		151	TP	5extended	TRUE
152	FBN1	Soton	c.4780G>A	p.(Gly1594Ser)	NM_000138.4:c.4780G>A	chr15	48758023	48465826	-	A+33		152	TN	exonic	TRUE
154	FBN1	Soton	c.5021G>A	p.(Cys1674Tyr)	NM_000138.4:c.5021G>A	chr15	48756140	48463943	-	D-45		154	TN	exonic	TRUE
155	FBN1	Soton	c.5296G>A	p.(Asp1766Asn)	NM_000138.4:c.5296G>A	chr15	48752443	48460246	-	D-1		155	TP	5extended	TRUE
156	FBN1	Soton	c.5372G>T	p.(Cys1791Phe)	NM_000138.4:c.5372G>T	chr15	48748884	48456687	-	D-51		156	TN	exonic	TRUE
157	FBN1	Soton	c.5377T>C	p.(Cys1793Arg)	NM_000138.4:c.5377T>C	chr15	48748879	48456682	-	D-46		157	TN	exonic	TRUE
158	FBN1	Soton	c.5497T>C	p.(Cys1833Arg)	NM_000138.4:c.5497T>C	chr15	48744807	48452610	-	D-49		158	TN	exonic	TRUE
159	FBN1	Soton	c.5627G>A	p.(Cys1876Tyr)	NM_000138.4:c.5627G>A	chr15	48741009	48448812	-	D-45		159	TN	exonic	TRUE
160	FBN1	Soton	c.5678A>G	p.(Asn1893Ser)	NM_000138.4:c.5678A>G	chr15	48739013	48446816	-	A+7		160	TN	exonic	TRUE
161	FBN1	Soton	c.5707G>A	p.(Gly1903Arg)	NM_000138.4:c.5707G>A	chr15	48738984	48446787	-	A+36		161	TN	exonic	TRUE
162	FBN1	Soton	c.5788+5G>A	N/A	NM_000138.4:c.5788+5G>A	chr15	48738898	48446701	-	D+5		162	TP	5extended	TRUE
163	FBN1	Soton	c.5789A>G	p.(Asp1930Gly)	NM_000138.4:c.5789A>G	chr15	48737701	48445504	-	A+1		163	TN	exonic	TRUE
164	FBN1	Soton	c.5834G>A	p.(Gly1945Asp)	NM_000138.4:c.5834G>A	chr15	48737656	48445459	-	A+46		164	TN	exonic	TRUE
165	FBN1	Soton	c.5926G>A	p.(Glu1976Lys)	NM_000138.4:c.5926G>A	chr15	48736849	48444652	-	A+9		165	TN	exonic	TRUE
166	FBN1	Soton	c.6031T>G	p.(Cys2011Gly)	NM_000138.4:c.6031T>G	chr15	48736744	48444547	-	D-7		166	TN	exonic	TRUE
167	FBN1	Soton	c.6158G>A	p.(Cys2053Tyr)	NM_000138.4:c.6158G>A	chr15	48733923	48441726	-	D-6		167	TN	exonic	TRUE
168	FBN1	Soton	c.6164-3C>T	N/A	NM_000138.4:c.6164-3C>T	chr15	48730117	48437920	-	A-3		168	TN	3intronic	TRUE
169	FBN1	Soton	c.6251G>C	p.(Cys2084Ser)	NM_000138.4:c.6251G>C	chr15	48730027	48437830	-	D-63		169	TN	exonic	TRUE
170	FBN1	Soton	c.6313+3A>T	N/A	NM_000138.4:c.6313+3A>T	chr15	48729962	48437765	-	D+3		170	TP	5extended	TRUE
171	FBN1	Soton	c.6453C>T	p.(=)	NM_000138.4:c.6453C>T	chr15	48729201	48437004	-	D-44		171	TP	exonic	TRUE
172	FBN1	Soton	c.6694T>C	p.(Cys2232Arg)	NM_000138.4:c.6694T>C	chr15	48725108	48432911	-	D-46		172	TN	exonic	TRUE
173	FBN1	Soton	c.6740-3C>G	N/A	NM_000138.4:c.6740-3C>G	chr15	48723002	48430805	-	A-3		173	TP	3intronic	TRUE
174	FBN1	Soton	c.6815A>G	p.(Tyr2272Cys)	NM_000138.4:c.6815A>G	chr15	48722924	48430727	-	D-57		174	TN	exonic	TRUE
175	FBN1	Soton	c.7003C>T	p.(Arg2335Trp)	NM_000138.4:c.7003C>T	chr15	48719965	48427768	-	A+6		175	TN	exonic	TRUE
176	FBN1	Soton	c.7203A>G	p.(=)	NM_000138.4:c.7203A>G	chr15	48719765	48427568	-	D-2		176	TP	5extended	TRUE
177	FBN1	Soton	c.7204G>C	p.(Asp2402His)	NM_000138.4:c.7204G>C	chr15	48719764	48427567	-	D-1		177	TP	5extended	TRUE
178	FBN1	Soton	c.7204+7C>G	N/A	NM_000138.4:c.7204+7C>G	chr15	48719757	48427560	-	D+7		178	TN	5intronic	TRUE
179	FBN1	Soton	c.7379A>G	p.(Lys2460Arg)	NM_000138.4:c.7379A>G	chr15	48717640	48425443	-	A+49		179	TN	exonic	TRUE
181	FBN1	Soton	c.7582T>C	p.(Cys2528Arg)	NM_000138.4:c.7582T>C	chr15	48713872	48421675	-	A+12		181	TN	exonic	TRUE
182	FBN1	Soton	c.7606G>A	p.(Gly2536Arg)	NM_000138.4:c.7606G>A	chr15	48713848	48421651	-	A+36		182	TP	exonic	TRUE
183	FBN1	Soton	c.7633C>T	p.(Pro2545Ser)	NM_000138.4:c.7633C>T	chr15	48713821	48421624	-	A+63		183	TN	exonic	TRUE
184	FBN1	Soton	c.7664G>T	p.(Gly2555Val)	NM_000138.4:c.7664G>T	chr15	48713790	48421593	-	D-36		184	TN	exonic	TRUE
185	FBN1	Soton	c.7754T>C	p.(Ile2585Thr)	NM_000138.4:c.7754T>C	chr15	48712949	48420752	-	A+55		185	TN	exonic	TRUE
186	FBN1	Soton	c.7916A>G	p.(Try2639Cys)	NM_000138.4:c.7916A>G	chr15	48707868	48415671	-	A+97		186	TN	exonic	TRUE
187	FBN1	Soton	c.8037C>G	p.(Phe2679Leu)	NM_000138.4:c.8037C>G	chr15	48707747	48415550	-	D-15		187	TN	exonic	TRUE
188	FBN1	Soton	c.8149G>A	p.(Glu2717Lys)	NM_000138.4:c.8149G>A	chr15	48704843	48412646	-	D-78		188	TN	exonic	TRUE
189	FBN2	Soton	c.4594+3A>G	N/A	NM_001999.3:c.4594+3A>G	chr5	127654568	128318876	-	D+3		189	TP	5extended	TRUE
190	FGFR1	Soton	c.1029G>A	p.(=)	NM_001174067.1:c.1029G>A	chr8	38282027	38424509	-	D-53		190	TP	exonic	TRUE
191	FLNA	Soton	c.2747A>T	p.(Lys916Met)	NM_001110556.1:c.2747A>T	chrX	153590426	154362058	-	D-80		191	TN	exonic	TRUE
193	HIKESHI (C11orf73)	Soton	c.539+3A>G homozygous	N/A	NM_016401.3:c.539+3A>G	chr11	86055766	86344724	+	D+3		193	TP	5extended	TRUE
194	IFT122	Soton	c.3039+4A>G	N/A	NM_052985.3:c.3039+4A>G	chr3	129226609	129507766	+	D+4		194	TP	5extended	TRUE
195	KANSL1	Soton	c.1848G>A	p.(=)	NM_015443.3:c.1848G>A	chr17	44143903	46066537	-	D-1		195	TP	5extended	TRUE
196	KANSL1	Soton	c.2725-5T>G	N/A	NM_015443.3:c.2725-5T>G	chr17	44110563	46033197	-	A-5		196	TP	3intronic	TRUE
199	MEF2C	Soton	c.835-9T>G	N/A	NM_002397.4:c.835-9T>G	chr5	88025173	88729356	-	A-9		199	TP	3intronic	TRUE
200	MEN1	Soton	c.1050-3C>G	N/A	NM_130799.2:c.1050-3C>G	chr11	64573245	64805773	-	A-3		200	TP	3intronic	TRUE
201	MFN2	Soton	c.838C>T	p.(Arg280Cys)	NM_014874.3:c.838C>T	chr1	12061479	12001422	+	A+22		201	TN	exonic	TRUE
202	MKKS*	Soton	c.749G>A	p.(Gly250Glu)	NM_018848.3:c.749G>A	chr20	10393414	10412766	-	D-237		202	TN	exonic	TRUE
203	MKKS*	Soton	c.803T>G	p.(Leu268Arg)	NM_018848.3:c.803T>G	chr20	10393360	10412712	-	D-183		203	TN	exonic	TRUE
204	MLH1	Soton	c.80G>A	p.(Arg27Gln)	NM_000249.2:c.80G>A	chr3	37035118	36993627	+	D-37		204	TN	exonic	TRUE
205	MLH1	Soton	c.122A>G	p.(Asp41Gly)	NM_000249.2:c.122A>G	chr3	37038115	36996624	+	A+6		205	TP	exonic	TRUE
206	MLH1	Soton	c.935A>C	p.(His312Pro)	NM_000249.2:c.935A>C	chr3	37061851	37020360	+	A+51		206	TN	exonic	TRUE
207	MLH1	Soton	c.1989+6T>G	N/A	NM_000249.2:c.1989+6T>G	chr3	37090106	37048615	+	D+6		207	TN	5extended	TRUE
209	MSH6	Soton	c.806C>G	p.(Thr269Ser)	NM_000179.2:c.806C>G	chr2	48025928	47798789	+	A+179		209	TN	exonic	TRUE
211	MSH6	Soton	c.3416G>A	p.(Gly1139Asp)	NM_000179.2:c.3416G>A	chr2	48030802	47803663	+	D-23		211	TN	exonic	TRUE
212	MSH6	Soton	c.3439-16C>T	N/A	NM_000179.2:c.3439-16C>T	chr2	48032033	47804894	+	A-16		212	TN	3intronic	TRUE
213	MYBPC3	Soton	c.1224-21A>G	N/A	NM_000256.3:c.1224-21A>G	chr11	47364834	47343283	-	A-21		213	TP	3intronic	TRUE
214	MYBPC3	Soton	c.1457+5G>C	N/A	NM_000256.3:c.1457+5G>C	chr11	47364376	47342825	-	D+5		214	TP	5extended	TRUE
215	MYBPC3	Soton	c.1624+4A>T	N/A	NM_000256.3:c.1624+4A>T	chr11	47364125	47342574	-	D+4		215	TP	5extended	TRUE
216	MYBPC3	Soton	c.3815-10T>G	N/A	NM_000256.3:c.3815-10T>G	chr11	47353442	47331891	-	A-10		216	TN	3intronic	TRUE
217	NDUFV1	Soton	c.1080G>A	p.(=)	NM_007103.3:c.1080G>A	chr11	67379040	67611569	+	D-1		217	TP	5extended	TRUE
218	NF1	Soton	c.1062+3A>G	N/A	NM_001042492.2:c.1062+3A>G	chr17	29527616	31200598	+	D+3		218	TP	5extended	TRUE
219	NF1	Soton	c.7895A>G	p.(Asp2632Gly)	NM_001042492.2:c.7895A>G	chr17	29684312	31357294	+	A+26		219	TP	exonic	TRUE
221	NGLY1	Soton	c.930C>T	p.(=)	NM_018297.3:c.930C>T	chr3	25778898	25737407	-	A+49		221	TP	exonic	TRUE
222	P3H1 (LEPRE1)	Soton	c.1224-80G>A	N/A	NM_001146289.1:c.1224-80G>A	chr1	43220741	42755070	-	A-80		222	TP	deep-intronic	TRUE
223	PAFAH1B1	Soton	c.900+3A>G	N/A	NM_000430.3:c.900+3A>G	chr17	2577585	2674291	+	D+3		223	TP	5extended	TRUE
224	PAFAH1B1	Soton	c.1002+6T>A	N/A	NM_000430.3:c.1002+6T>A	chr17	2579906	2676612	+	D+6		224	TP	5extended	TRUE
225	PALB2	Soton	c.3201+5G>C	N/A	NM_024675.3:c.3201+5G>C	chr16	23625320	23613999	-	D+5		225	TP	5extended	TRUE
226	PIEZO1	Soton	c.6651C>A	p.(=)	NM_001142864.2:c.6651C>A	chr16	88783440	88717032	-	D-10		226	TN	exonic	TRUE
227	PIEZO1	Soton	c.6963C>T	p.(=)	NM_001142864.2:c.6963C>T	chr16	88782855	88716447	-	A+37		227	TN	exonic	TRUE
228	PIGB	Soton	c.847-10A>G	N/A	NM_004855.4:c.847-10A>G	chr15	55632800	55340602	+	A-10		228	TP	3intronic	TRUE
229	PKD1	Soton	c.1723-23T>C	N/A	NM_001009944.2:c.1723-23T>C	chr16	2166142	2116141	-	A-23		229	TN	3intronic	TRUE
231	PNKP	Soton	c.578+4A>G	N/A	NM_007254.3:c.578+4A>G	chr19	50367577	49864320	-	D+4		231	TP	5extended	TRUE
233	POLD1	Soton	c.1620C>T	p.(=)	NM_001308632.1:c.1620C>T	chr19	50910365	50407108	+	D-67		233	TN	exonic	TRUE
234	PTCH1	Soton	c.2704-11C>T	N/A	NM_000264.4:c.2704-11C>T	chr9	98222076	95459794	-	A-11		234	TN	3intronic	TRUE
237	PTEN	Soton	c.253G>C	p.(Val85Leu)	NM_000314.4:c.253G>C	chr10	89690846	87931089	+	D-1		237	TP	5extended	TRUE
238	PTEN	Soton	c.373A>G	p.(Lys125Glu)	NM_000314.4:c.373A>G	chr10	89692889	87933132	+	A+120 D-120		238	TN	exonic	TRUE
239	PTEN	Soton	c.553C>G	p.(His185Asp)	NM_000314.4:c.553C>G	chr10	89711935	87952178	+	A+61		239	TN	exonic	TRUE
240	PTEN	Soton	c.593T>C	p.(Met198Thr)	NM_000314.4:c.593T>C	chr10	89711975	87952218	+	D-42		240	TN	exonic	TRUE
241	PTEN	Soton	c.830C>T	p.(Thr277Ile)	NM_000314.4:c.830C>T	chr10	89720679	87960922	+	A+29		241	TN	exonic	TRUE
242	RASA1	Soton	c.2011+6T>G	N/A	NM_002890.2:c.2011+6T>G	chr5	86670739	87374922	+	D+6		242	TP	5extended	TRUE
243	RPS7	Soton	c.507+3A>G	N/A	NM_001011.3:c.507+3A>G	chr2	3627853	3580263	+	D+3		243	TN	5extended	TRUE
244	SDHD	Soton	c.314+5G>A	N/A	NM_003002.2:c.314+5G>A	chr11	111959740	112089016	+	D+5		244	TP	5extended	TRUE
245	SF3B4	Soton	c.417C>T	p.(=)	NM_005850.4:c.417C>T	chr1	149898557	149926665	-	A+254		245	TP	exonic	TRUE
247	SMAD3	Soton	c.802C>T	p.(Arg268Cys)	NM_005902.3:c.802C>T	chr15	67473722	67181384	+	D-70		247	TN	exonic	TRUE
248	SPTBN2	Soton	c.4150C>A	p.(=)	NM_006946.2:c.4150C>A	chr11	66463876	66696405	-	D-129		248	TN	exonic	TRUE
249	TAF1	Soton	c.488C>A	p.(Pro163Gln)	NM_001286074.1:c.488C>A	chrX	70595092	71375242	+	D-45		249	TN	exonic	TRUE
250	TBCD	Soton	c.1922G>C	p.(Arg641Thr)	NM_005993.4:c.1922G>C	chr17	80863929	82906053	+	D-1		250	TP	5extended	TRUE
251	TGFBR1	Soton	c.574G>C	p.(Pro163Gln)	NM_001306210.1:c.574G>C	chr9	101895009	99132727	+	D-1		251	TP	5extended	TRUE
252	TP53	Soton	c.623A>G	p.(Asp208Gly)	NM_000546.4:c.623A>G	chr17	7578226	7674908	-	D-50		252	TN	exonic	TRUE
253	TP53	Soton	c.783-60G>A	N/A	NM_000546.4:c.783-60G>A	chr17	7577215	7673897	-	A-60		253	TN	deep-intronic	TRUE
255	TSC1	Soton	c.211-7T>G	N/A	NM_000368.4:c.211-7T>G	chr9	135801133	132925746	-	A-7		255	TP	3intronic	TRUE
256	TSC2	Soton	c.4492A>C	p.(Ser1498Arg)	NM_000548.3:c.4492A>C	chr16	2134715	2084714	+	D-2		256	TP	5extended	TRUE
257	VPS13B	Soton	c.7226C>T	p.(Pro2409Leu)	NM_017890.4:c.7226C>T	chr8	100779102	99766874	+	D-97		257	TN	exonic	TRUE
												NM_000180.3:c.3043+5G>A	TP	5extended
												NM_000256.3:c.1224-21A>G	TP	3intronic
												NM_000283.3:c.2130-15G>A	TP	3intronic
												NM_000350.2:c.5584+6T>C	TP	5extended
												NM_000492.3:c.3874-4522A>G	TP	deep-intronic
												NM_001034853.1:c.1754-3G>C	TP	3intronic
												NM_001034853.1:c.247G>T	TP	5extended
												NM_001040142.1:c.2919+3A>G	TP	5extended
												NM_001098.2:c.526-642C>T	TN	deep-intronic
												NM_001142800.1:c.6571+4558A>G	TN	deep-intronic
												NM_001277115.1:c.6547-963G>A	TP	3intronic
												NM_002335.2:c.1413-7T>A	TN	3intronic
												NM_002420.5:c.899+29G>A	TP	5intronic
												NM_005208.4:c.213C>T	TP	5extended
												NM_006204.3:c.1072-11T>C	TN	3intronic
												NM_006343.2:c.2486+6T>A	TP	5extended
												NM_015600.4:c.867+5G>A	TP	5extended
												NM_015629.3:c.528-38C>T	TN	3intronic
												NM_020366.3:c.491-386C>T	TN	deep-intronic
												NM_024649.4:c.592-21A>T	TN	3intronic
												NM_206933.2:c.14343+36C>G	TN	5intronic
